# Supplementary material for: Experimental electron densities of neutral and zwitterionic forms of the drug piroxicam
Source: Royal Society of Chemistry journal article supplement (doi:10.1039/c5ce02397a), 2016-01-01
Supplement: c5ce02397a1.pdf [file c5ce02397a1.pdf]

## Experimental electron densities of neutral and zwitterionic forms of piroxicam drug

X. Shi,<sup>a</sup> N. El Hassan,<sup>a</sup> A. Ikni,<sup>a</sup> W. Li,<sup>a</sup> N. Guiblin,<sup>a</sup> A. Spasojević de-Biré<sup>a</sup> and N.E. Ghermani<sup>a,b,\*</sup>

---

<sup>a.</sup> *Laboratoire Structures, Propriétés et Modélisation des Solides, Université Paris Saclay, CentraleSupélec, CNRS; Grande voie des vignes, 92295 Châtenay-Malabry, France.*

<sup>b.</sup> *Laboratoire de Physique Pharmaceutique, Institut Galien Paris Sud, UMR CNRS 8612, Université Paris Sud, Faculté de Pharmacie ; 5, rue Jean-Baptiste Clément, 92296 Châtenay-Malabry, France.*

## SUPPORTING INFORMATION

|                                                                                                                                                                                                                                                                                                                                                                                                                                                                                                                               |    |
|-------------------------------------------------------------------------------------------------------------------------------------------------------------------------------------------------------------------------------------------------------------------------------------------------------------------------------------------------------------------------------------------------------------------------------------------------------------------------------------------------------------------------------|----|
| <b>Text TS1.</b> Additionnal information on Scheme 2. ....                                                                                                                                                                                                                                                                                                                                                                                                                                                                    | 4  |
| Scheme S1. Possible tautomers of piroxicam: nPX1 (N2H-O3H); nPX2 (N2H-O4H); nPX3 (N3H-O3H); nPX4 (N3H-O4H) and nPX5 (O3H-O4H) respectively.....                                                                                                                                                                                                                                                                                                                                                                               | 6  |
| Scheme S2. Possible resonance structure of zwitterionic form.....                                                                                                                                                                                                                                                                                                                                                                                                                                                             | 6  |
| Scheme S3. Cationic form and 3 different conformations (EZE, ZZZ and ZZE) of anionic form found in crystal structures respectively.....                                                                                                                                                                                                                                                                                                                                                                                       | 6  |
| Scheme S4. Structure formula based on statistic study for zwitterionic form (a) and ZZE anionic form (b).....                                                                                                                                                                                                                                                                                                                                                                                                                 | 6  |
| <b>Figure S1.</b> Bond distance in Å for all 20 structures of neutral piroxicam studied in crystal forms. (a) C-O bond distance; (b) C-C bond distance; (c) C-N bond distance. Each radius presents one structure, of which the upward vertical radius is from the structure. ....                                                                                                                                                                                                                                            | 7  |
| <b>Figure S2.</b> Bond distance in Å for all 20 structures of neutral piroxicam and 27 structures of zwitterionic piroxicam studied in crystal forms. (a) C-O bond distance, dotted line for C2-O3, full line for C10-O4; (b) C-C bond distance, dotted line for C1-C10, full line for C1-C2; (c) C-N bond distance, dotted line for N2-C11, full line for N3-C11. Each radius presents one structure, of which the upward vertical radius is from the structure studied in this paper. ....                                  | 8  |
| <b>Figure S3.</b> Bond distance in Å for all 20 structures of neutral piroxicam and 5 structures of cationic piroxicam studied in crystal forms. (a) C-O bond distance, dotted line for C2-O3, full line for C10-O4; (b) C-C bond distance, dotted line for C1-C10, full line for C1-C2; (c) C-N bond distance, dotted line for N2-C11, full line for N3-C11. Each radius presents one structure. ....                                                                                                                        | 9  |
| <b>Figure S4.</b> Bond distance in Å for all 20 structures of neutral piroxicam and 9 structures of anionic piroxicam in salt studied in crystal forms. One anionic structure has disorder at N3 and C11, thus for C-O and C-C, it is counted twice in the figure. (a) C-O bond distance, dotted line for C2-O3, full line for C10-O4; (b) C-C bond distance, dotted line for C1-C10, full line for C1-C2; (c) C-N bond distance, dotted line for N2-C11, full line for N3-C11. Each radius presents one structure. ....      | 10 |
| <b>Figure S5.</b> Bond distance in Å for all 27 structures of zwitterionic piroxicam and 9 structures of anionic piroxicam in salt studied in crystal forms. One anionic structure has disorder at N3 and C11, thus for C-O and C-C, it is counted twice in the figure. (a) C-O bond distance, dotted line for C2-O3, full line for C10-O4; (b) C-C bond distance, dotted line for C1-C10, full line for C1-C2; (c) C-N bond distance, dotted line for N2-C11, full line for N3-C11. Each radius presents one structure. .... | 11 |
| <b>Figure S6.</b> Bond distance in Å for all 20 structures of neutral piroxicam and 4 structures of neutral piroxicam in complex studied in crystal forms. (a) C-O bond distance, dotted line for C2-O3, full line for C10-O4; (b) C-C bond distance, dotted line for C1-C10, full line for C1-C2; (c) C-N bond distance, dotted line for N2-C11, full line for N3-C11. Each radius presents one structure. ....                                                                                                              | 12 |
| <b>Figure S7.</b> Bond distance in Å for all 27 structures of zwitterionic piroxicam and 7 structures of EZE conformation anionic piroxicam in complex studied in crystal forms. (a) C-O bond distance, dotted line for C2-O3, full line for C10-O4; (b) C-C bond distance, dotted line for C1-C10, full line for C1-C2; (c) C-N bond distance, dotted line for N2-C11, full line for N3-C11. Each radius presents one structure. ....                                                                                        | 13 |
| <b>Figure S8.</b> Residual density map at the plan S-O-O for nPX, zPXL, zPXR, sulfathiazole IV, III-A and III-B respectively. The contour intervals are 0.1 e Å <sup>-3</sup> ; positive contours are shown with blue solid lines, negative contours with red lines, and the zero contours with pale yellow dashes. All data included. ....                                                                                                                                                                                   | 14 |

|                                                                                                                                                                                                                                                                                                                                                        |    |
|--------------------------------------------------------------------------------------------------------------------------------------------------------------------------------------------------------------------------------------------------------------------------------------------------------------------------------------------------------|----|
| <b>Figure S9.</b> Residual density map at the plan S-C-N for nPX, zPXL, zPXR, sulfathiazole IV, III-A and III-B respectively. The contour intervals are $0.1 \text{ e } \text{\AA}^{-3}$ ; positive contours are shown with blue solid lines, negative contours with red lines, and the zero contours with pale yellow dashes. All data included. .... | 15 |
| <b>Figure S10.</b> Static deformation density map at the plan S-O-O for nPX, zPXL, zPXR, sulfathiazole IV, III-A and III-B respectively. The contour intervals are $0.05 \text{ e } \text{\AA}^{-3}$ ; positive contours are shown with blue solid lines, negative contours with red lines, and the zero contours with pale yellow dashes. ....        | 16 |
| <b>Figure S11.</b> Static deformation density map at the plan S-C-N for nPX, zPXL, zPXR, sulfathiazole IV, III-A and III-B respectively. The contour intervals are $0.05 \text{ e } \text{\AA}^{-3}$ ; positive contours are shown with blue solid lines, negative contours with red lines, and the zero contours with pale yellow dashes. ....        | 17 |
| <b>Figure S12.</b> 2D laplacian map of total electron density at the plan S-O-O for nPX, zPXL, zPXR, sulfathiazole IV, III-A and III-B respectively. Contour intervals are $\pm 2, 4, 8 \times 10^n \text{ e } \text{\AA}^{-5}$ ( $n=-1, 0, 1, 2$ ); positive contours are shown with blue dashed lines, negative contours with red solid lines. ....  | 18 |
| <b>Figure S13.</b> 2D laplacian map of total electron density at the plan S-C-N for nPX, zPXL, zPXR, sulfathiazole IV, III-A and III-B respectively. Contour intervals are $\pm 2, 4, 8 \times 10^n \text{ e } \text{\AA}^{-5}$ ( $n=-1, 0, 1, 2$ ); positive contours are shown with blue dashed lines, negative contours with red solid lines. ....  | 19 |
| <b>Figure S14.</b> Residual density map at the phenyl and pyridine plan for nPX, zPXL, zPXR respectively. The contour intervals are $0.1 \text{ e } \text{\AA}^{-3}$ ; positive contours are shown with blue solid lines, negative contours with red lines, and the zero contours with pale yellow dashes. ....                                        | 20 |
| <b>Figure S15.</b> Static deformation density map at the phenyl and pyridine plan for nPX, zPXL, zPXR respectively. The contour intervals are $0.05 \text{ e } \text{\AA}^{-3}$ ; positive contours are shown with blue solid lines, negative contours with red lines, and the zero contours with pale yellow dashes. ....                             | 21 |
| <b>Figure S16.</b> 2D laplacian map of total electron density at phenyl and pyridine plan for nPX, zPXL, zPXR respectively. Contour intervals are $\pm 2, 4, 8 \times 10^n \text{ e } \text{\AA}^{-5}$ ( $n=-1, 0, 1, 2$ ); positive contours are shown with blue dashed lines, negative contours with red solid lines. ....                           | 22 |
| <b>Figure S17.</b> Electrostatic potential generated at the molecular surface (total electron density equals $0.001 \text{ e Bohr}^{-3}$ i.e. $0.0067 \text{ e } \text{\AA}^{-3}$ ) for nPX, zPXL and zPXR molecule respectively. ....                                                                                                                 | 23 |
| <b>Table S1.</b> Crystallization situations of piroxicam in polymorphs, hydrates, co-crystals, salts and complexes as retrieved from the CSD database. ....                                                                                                                                                                                            | 24 |
| <b>Table S2.</b> Data Collection and Refinement Details of form III and IV of sulfathiazole ....                                                                                                                                                                                                                                                       | 28 |
| <b>Table S3.</b> Estimate of average error on the electron density map. $\sigma(\Delta\rho) = 2/\sqrt{V} * [\sum(k.F_o - F_c)^2]^{1/2}$ (Rees, B. Acta Cryst. 1976, A32, 483-488). ....                                                                                                                                                                | 29 |
| <b>Table S4.</b> Topology of the experimental electron density of piroxicam (nPX, zPXL and zPXR) for covalent bonds not listed in the paper. ....                                                                                                                                                                                                      | 30 |
| <b>Table S5</b> Selected bond lengths and angles. Standard deviations are in parentheses. For hydrogen bonds, D is the donor and A, the acceptor. ....                                                                                                                                                                                                 | 31 |

## Supplementary Material Text TS1.

### Additional information on Scheme 2.

#### Different piroxicam (PX) drug: neutral, zwitterionic, anionic and cationic forms.

Tautomerization is an intramolecular isomerization that involves breaking or making bonds. In the case of PX, this prototropic tautomerism results in the proton transfer accompanied by electron delocalization. Five possible tautomers are shown in Scheme S1. The different conformations depend on which of the C-O bond is a double bond and on whether the nitrogen of the pyridine ring is free (nPX1, nPX2), implied in an intramolecular hydrogen bond (nPX5) or is linked to a proton (nPX3, nPX4).

The switch of covalent bond properties C-O (C2-O3 and C10-O4) and C-N (N2-C11 and N3-C11) can be determined *via* bond distances values. We have thus measured the corresponding C-O and C-N bonds in published crystal structure extracted from CSD<sup>1</sup>, where PX keeps the neutral form. Figure S1 shows, for all studied structures, larger distance between O3 and C2 than that between O4 and C10, the difference is around 0.1Å. In Figure S1b, a difference of 0.1Å exists in the neighbour bonds C1-C2 and C1-C10. We conclude that in solid state C10-O4 and C1-C2 bonds are more likely double bonds and the hydrogen atom may not be attached to O4. The nPX2, nPX4 and nPX5 tautomers should be excluded. Figure S1c shows the C-N bond; N3-C11 is statistically shorter than N2-C11 bond with a difference of 0.05Å, which is consistent with properties of the pyridine ring. nPX3 tautomer is excluded. Therefore PX crystallizes in neutral form only in the nPX1 (N2H, O3H) EZE conformation. PX may also present in crystal structures charged forms such as zwitterionic, cationic and anionic form. Table S1 summarizes the different structures extracted from CSD.<sup>1</sup> Neutral form exists in 3 polymorphs, 16 co-crystals and 3 complexes; zwitterionic form exists in monohydrate and 20 co-crystals; cationic form exists in 5 salts; anionic form exists in 6 salts and 9 complexes among which one anionic form complex has ZZZ conformation and another presents ZZE conformation (Scheme S3).

The four resonance structures of the zwitterionic form (Scheme S2) show its possible extreme configuration. In crystallographic studies, the refined structure is usually more like a resonance hybrid. Bond distances of neutral and zwitterionic form are shown in Figure S2. Considering only the orange lines, one can observe that N2-C11 and N3-C11 have similar values and C10-O4 is shorter than C2-O3. Compared to neutral form, C2-O3 and N2-C11 simple bonds are shortened towards C10-O4 and N3-C11 respectively whereas C1-C2 double bond is extended towards C1-C10 simple bond (Figure S2a and S2b). These observations indicate the existence of an electron delocalization along the chain (O3, C2, C1, C10, N2, C11) in zwitterionic form. The representation in Scheme S4a is the closest representation to the crystal structures observations. However, the distance between N3 and C11 remains the same, which signifies that the proton transfer does not much influence on the pyridyl ring (Figure S2c).

Cationic form has the same configuration as the neutral form, and these 6 distances are rather similar except the N2-C11 bond which is slightly shortened due to the proton capture at N3 (Figure S3).

Anionic form in salts all crystallizes in EZZ conformation. Compared to neutral form, the C-N bonds are similar; compared to zwitterionic form, the C-O and C-C bonds share similar statistic results (Figures S4 and S5) as well as electron delocalization along part of the main chain (Scheme S4b). Participation of metal atoms has various influences on chemical conditions of ligands, thus the similar configuration does not always result in comparable bond distances (Figures S6 and S7). The two complexes, in which PX presents unique conformation, are not reported in these figures.

#### References

- 1 The Cambridge Structural Database: A quarter of a million crystal structures and rising. F.H. Allen, *Acta Crystallogr.*, 2002, B58, 380.

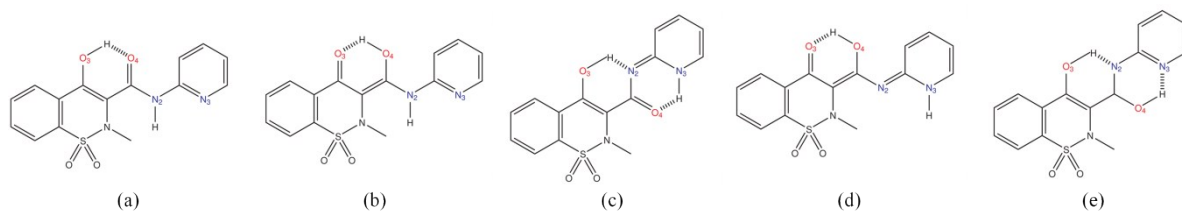

**Scheme S1.** Possible tautomers of piroxicam: nPX1 (N2H-O3H); nPX2 (N2H-O4H); nPX3 (N3H-O3H); nPX4 (N3H-O4H) and nPX5 (O3H-O4H) respectively.

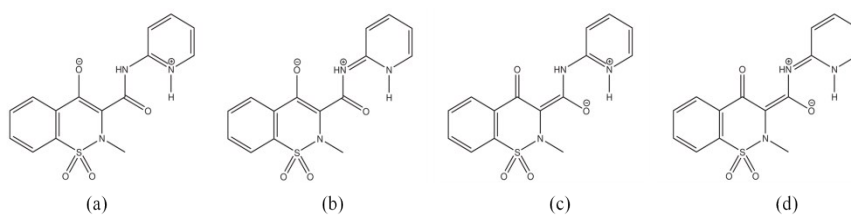

**Scheme S2.** Possible resonance structure of zwitterionic form.

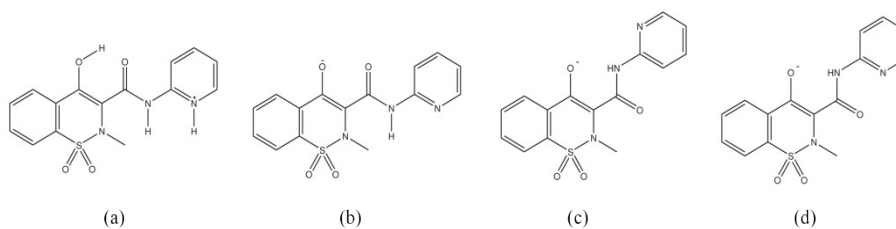

**Scheme S3.** Cationic form and 3 different conformations (EZE, ZZZ and ZZE) of anionic form found in crystal structures respectively.

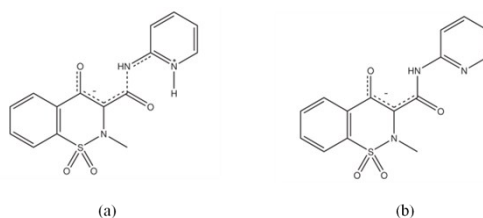

**Scheme S4.** Structure formula based on statistic study for zwitterionic form (a) and ZZE anionic form (b).

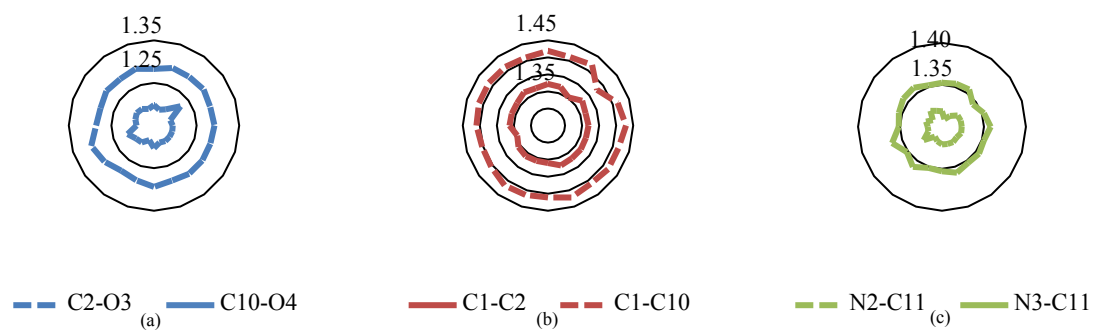

**Figure S1.** Bond distance in Å for all 20 structures of neutral piroxicam studied in crystal forms. (a) C-O bond distance; (b) C-C bond distance; (c) C-N bond distance. Each radius presents one structure, of which the upward vertical radius is from the structure.

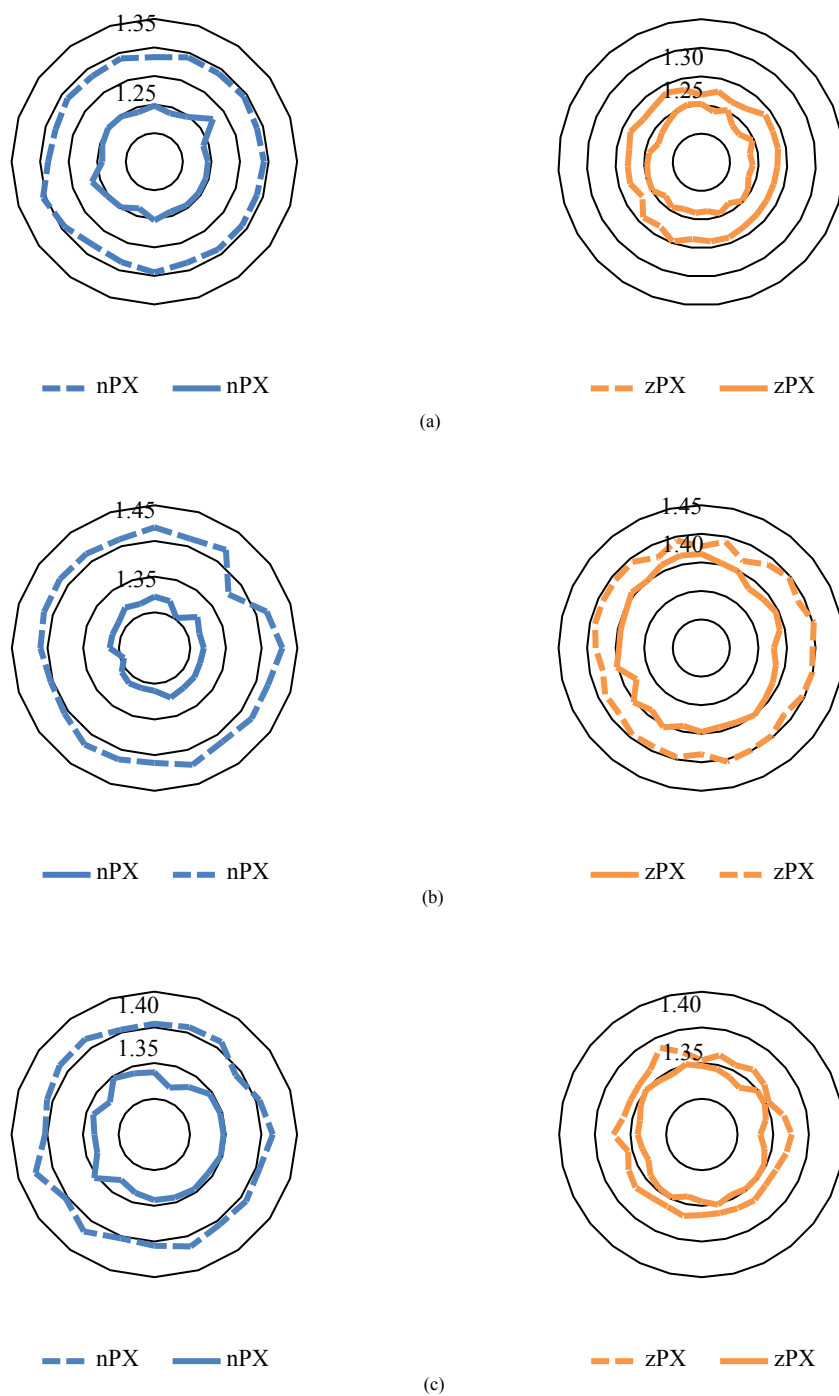

**Figure S2.** Bond distance in Å for all 20 structures of neutral piroxicam and 27 structures of zwitterionic piroxicam studied in crystal forms. (a) C-O bond distance, dotted line for C2-O3, full line for C10-O4; (b) C-C bond distance, dotted line for C1-C10, full line for C1-C2; (c) C-N bond distance, dotted line for N2-C11, full line for N3-C11. Each radius presents one structure, of which the upward vertical radius is from the structure studied in this paper.



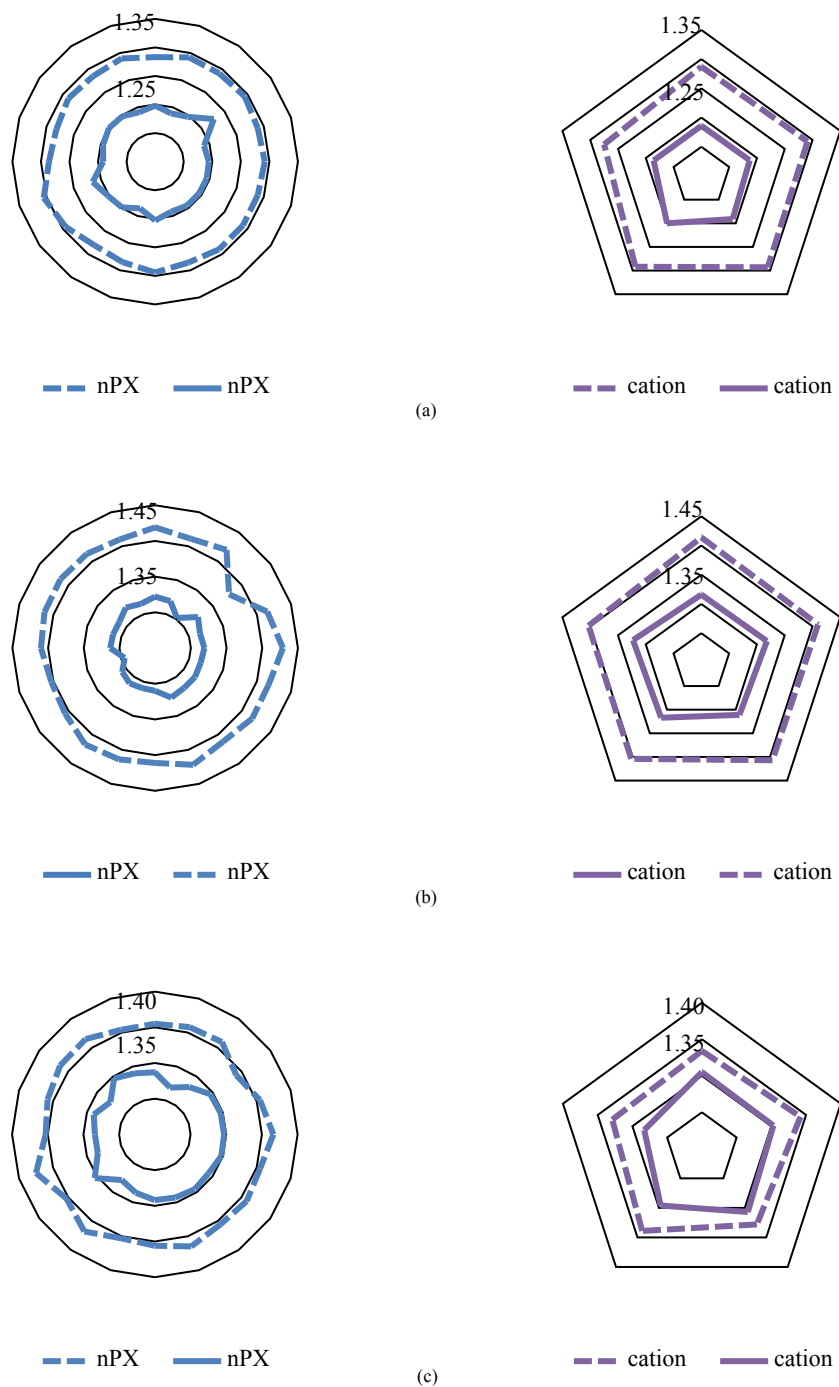

**Figure S3.** Bond distance in Å for all 20 structures of neutral piroxicam and 5 structures of cationic piroxicam studied in crystal forms. (a) C-O bond distance, dotted line for C2-O3, full line for C10-O4; (b) C-C bond distance, dotted line for C1-C10, full line for C1-C2; (c) C-N bond distance, dotted line for N2-C11, full line for N3-C11. Each radius presents one structure.

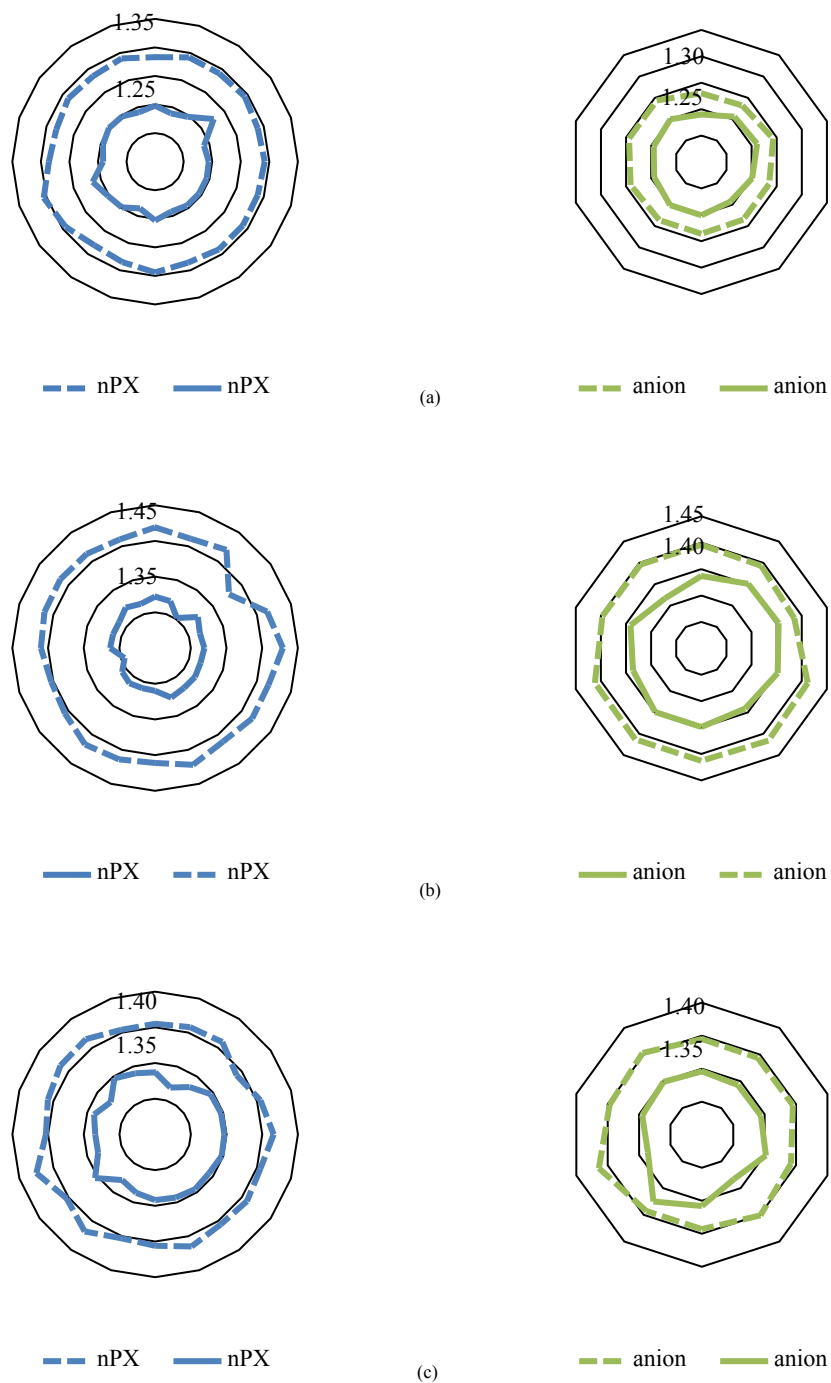

**Figure S4.** Bond distance in Å for all 20 structures of neutral piroxicam and 9 structures of anionic piroxicam in salt studied in crystal forms. One anionic structure has disorder at N3 and C11, thus for C-O and C-C, it is counted twice in the figure. (a) C-O bond distance, dotted line for C2-O3, full line for C10-O4; (b) C-C bond distance, dotted line for C1-C10, full line for C1-C2; (c) C-N bond distance, dotted line for N2-C11, full line for N3-C11. Each radius presents one structure.

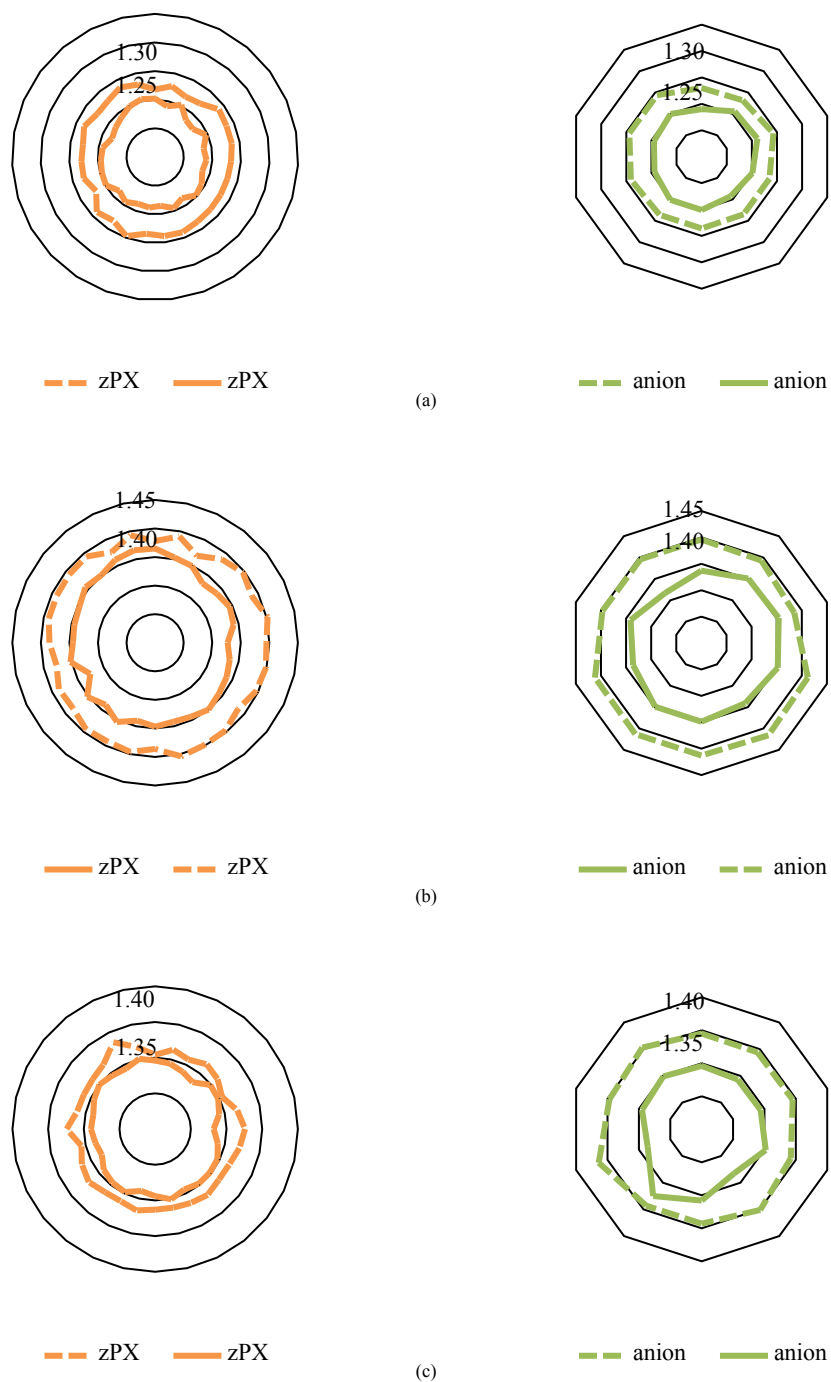

**Figure S5.** Bond distance in Å for all 27 structures of zwitterionic piroxicam and 9 structures of anionic piroxicam in salt studied in crystal forms. One anionic structure has disorder at N3 and C11, thus for C-O and C-C, it is counted twice in the figure. (a) C- O bond distance, dotted line for C2-O3, full line for C10-O4; (b) C-C bond distance, dotted line for C1-C10, full line for C1-C2; (c) C-N bond distance, dotted line for N2-C11, full line for N3-C11. Each radius presents one structure.

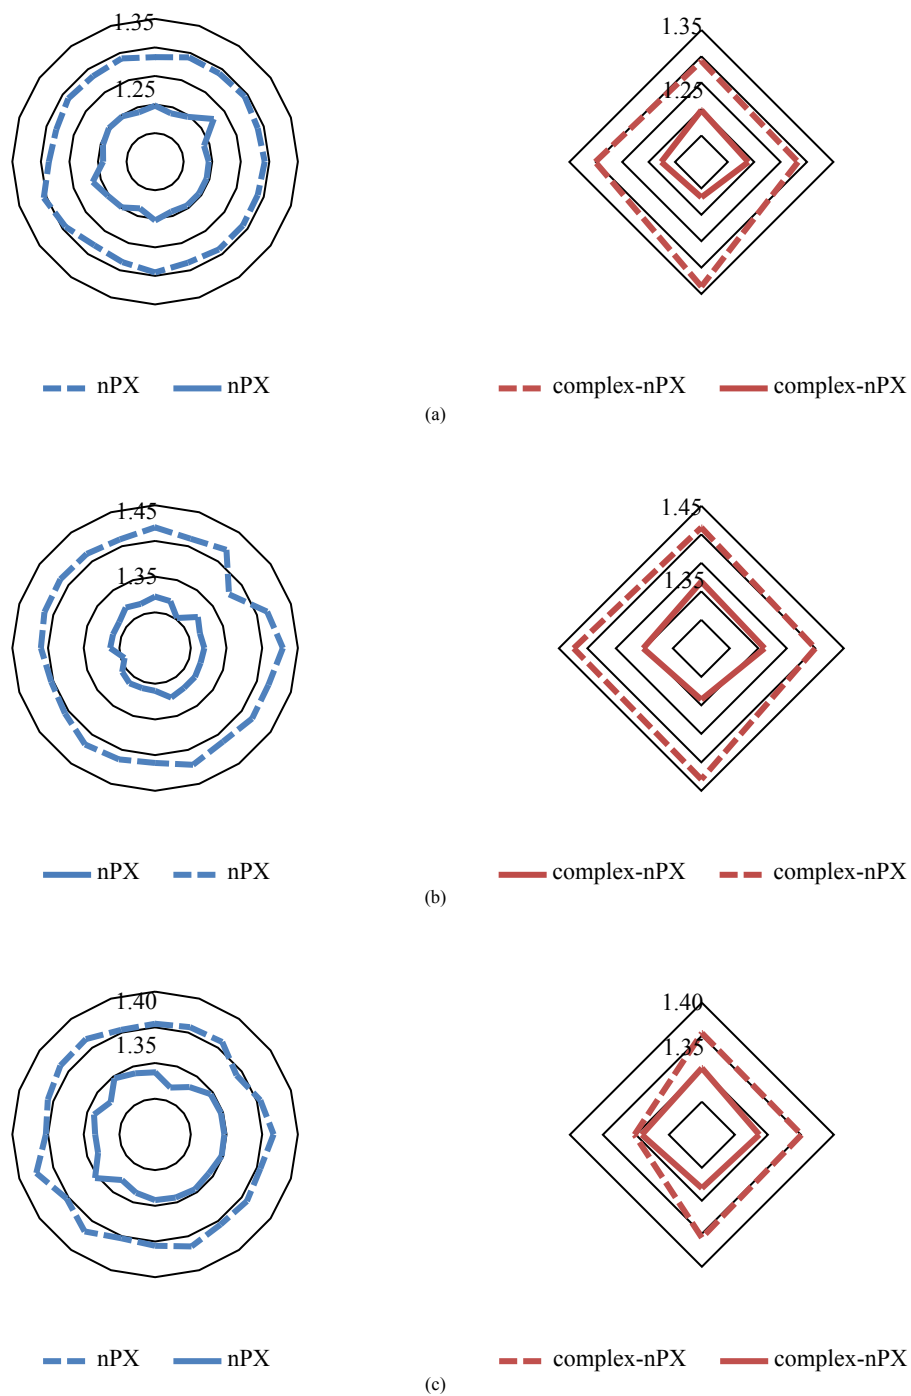

**Figure S6.** Bond distance in Å for all 20 structures of neutral piroxicam and 4 structures of neutral piroxicam in complex studied in crystal forms. (a) C-O bond distance, dotted line for C2-O3, full line for C10-O4; (b) C-C bond distance, dotted line for C1-C10, full line for C1-C2; (c) C-N bond distance, dotted line for N2-C11, full line for N3-C11. Each radius presents one structure.

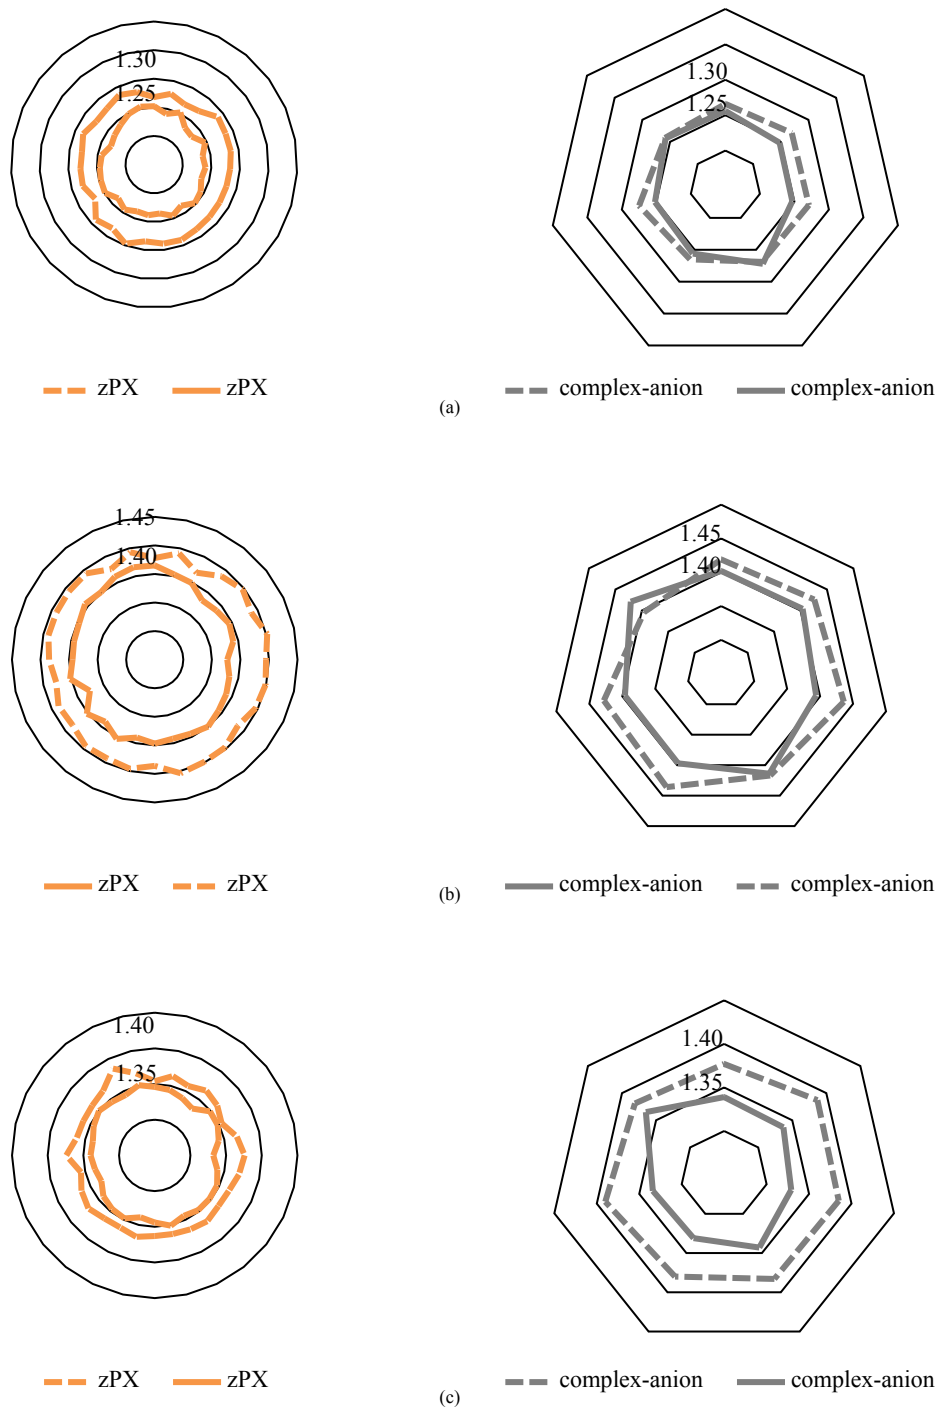

**Figure S7.** Bond distance in Å for all 27 structures of zwitterionic piroxicam and 7 structures of *EZE* conformation anionic piroxicam in complex studied in crystal forms. (a) C-O bond distance, dotted line for C2-O3, full line for C10-O4; (b) C-C bond distance, dotted line for C1-C10, full line for C1-C2; (c) C-N bond distance, dotted line for N2-C11, full line for N3-C11. Each radius presents one structure.

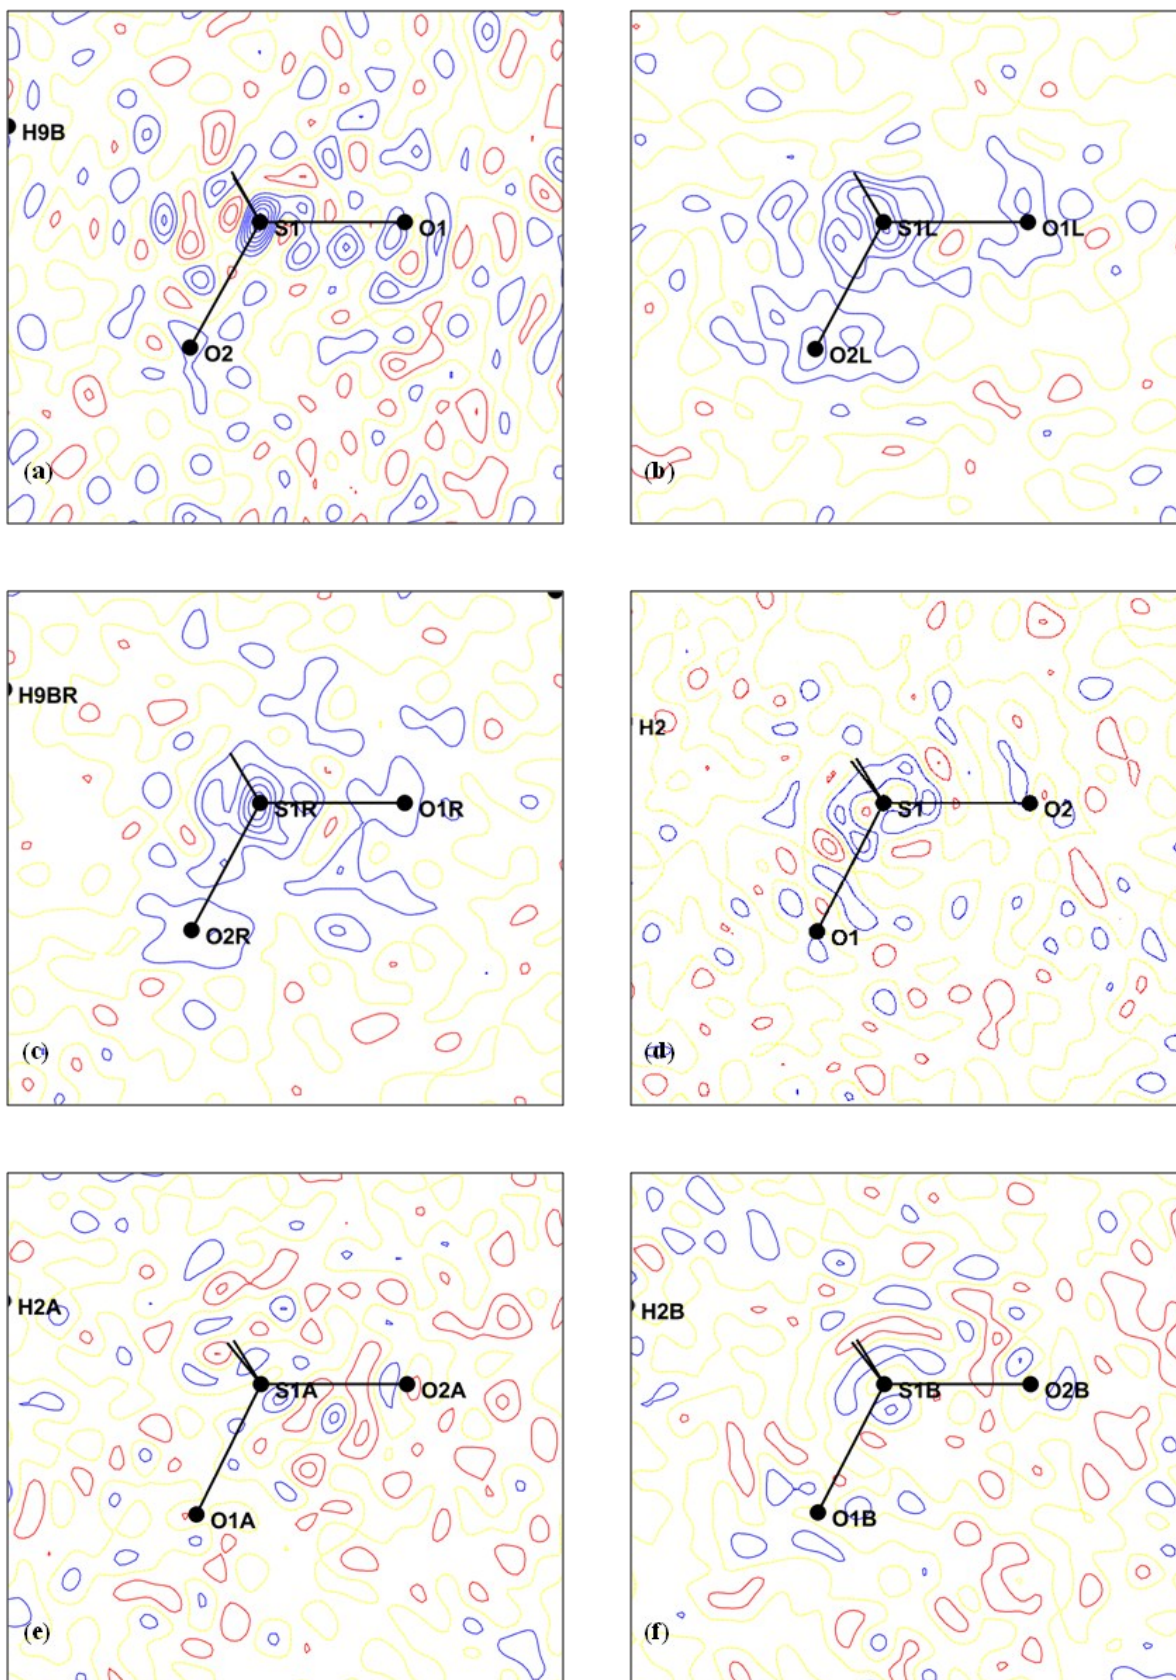

**Figure S8.** Residual density map at the plan S-O-O for nPX, zPXL, zPXR, sulfathiazole IV, III-A and III-B respectively. The contour intervals are  $0.1 \text{ e} \text{ \AA}^{-3}$ ; positive contours are shown with blue solid lines, negative contours with red lines, and the zero contours with pale yellow dashes. All data included.



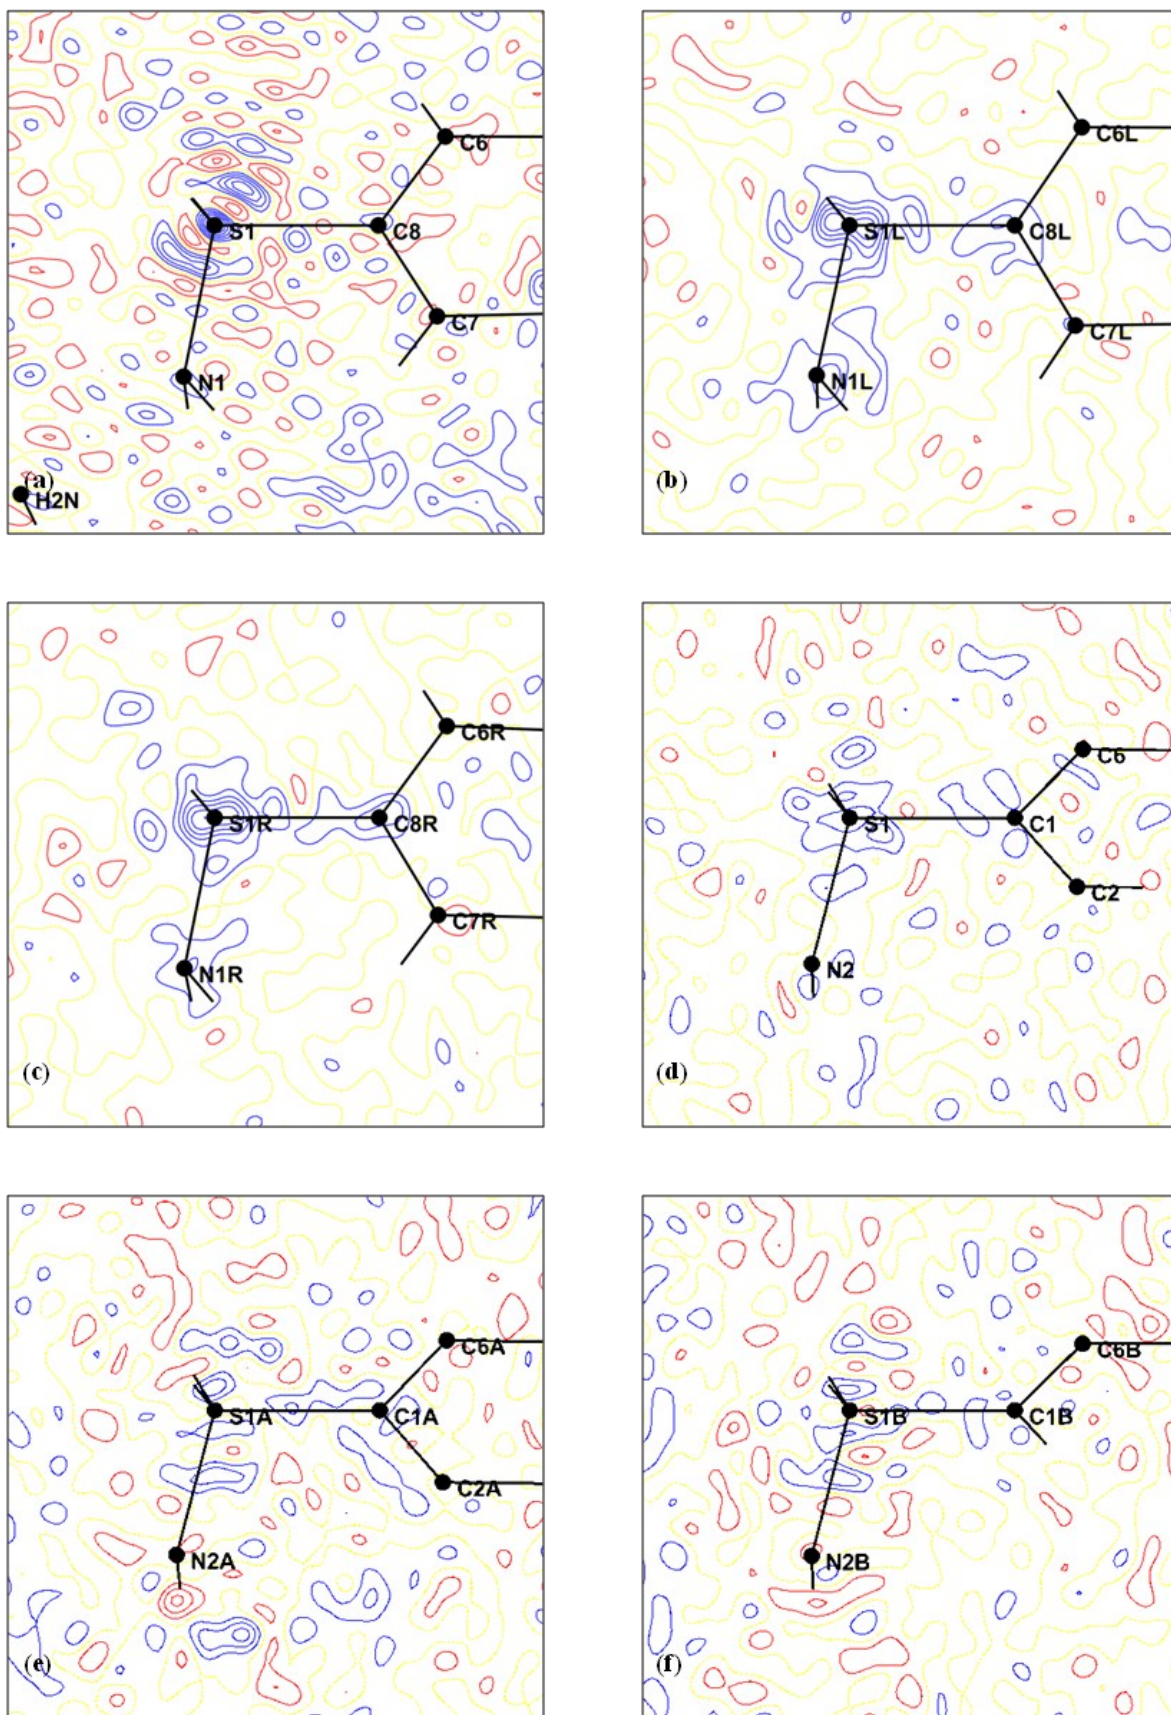

**Figure S9.** Residual density map at the plan S-C-N for nPX, zPXL, zPXR, sulfathiazole IV, III-A and III-B respectively. The contour intervals are  $0.1 \text{ e} \text{ \AA}^{-3}$ ; positive contours are shown with blue solid lines, negative contours with red lines, and the zero contours with pale yellow dashes. All data included.

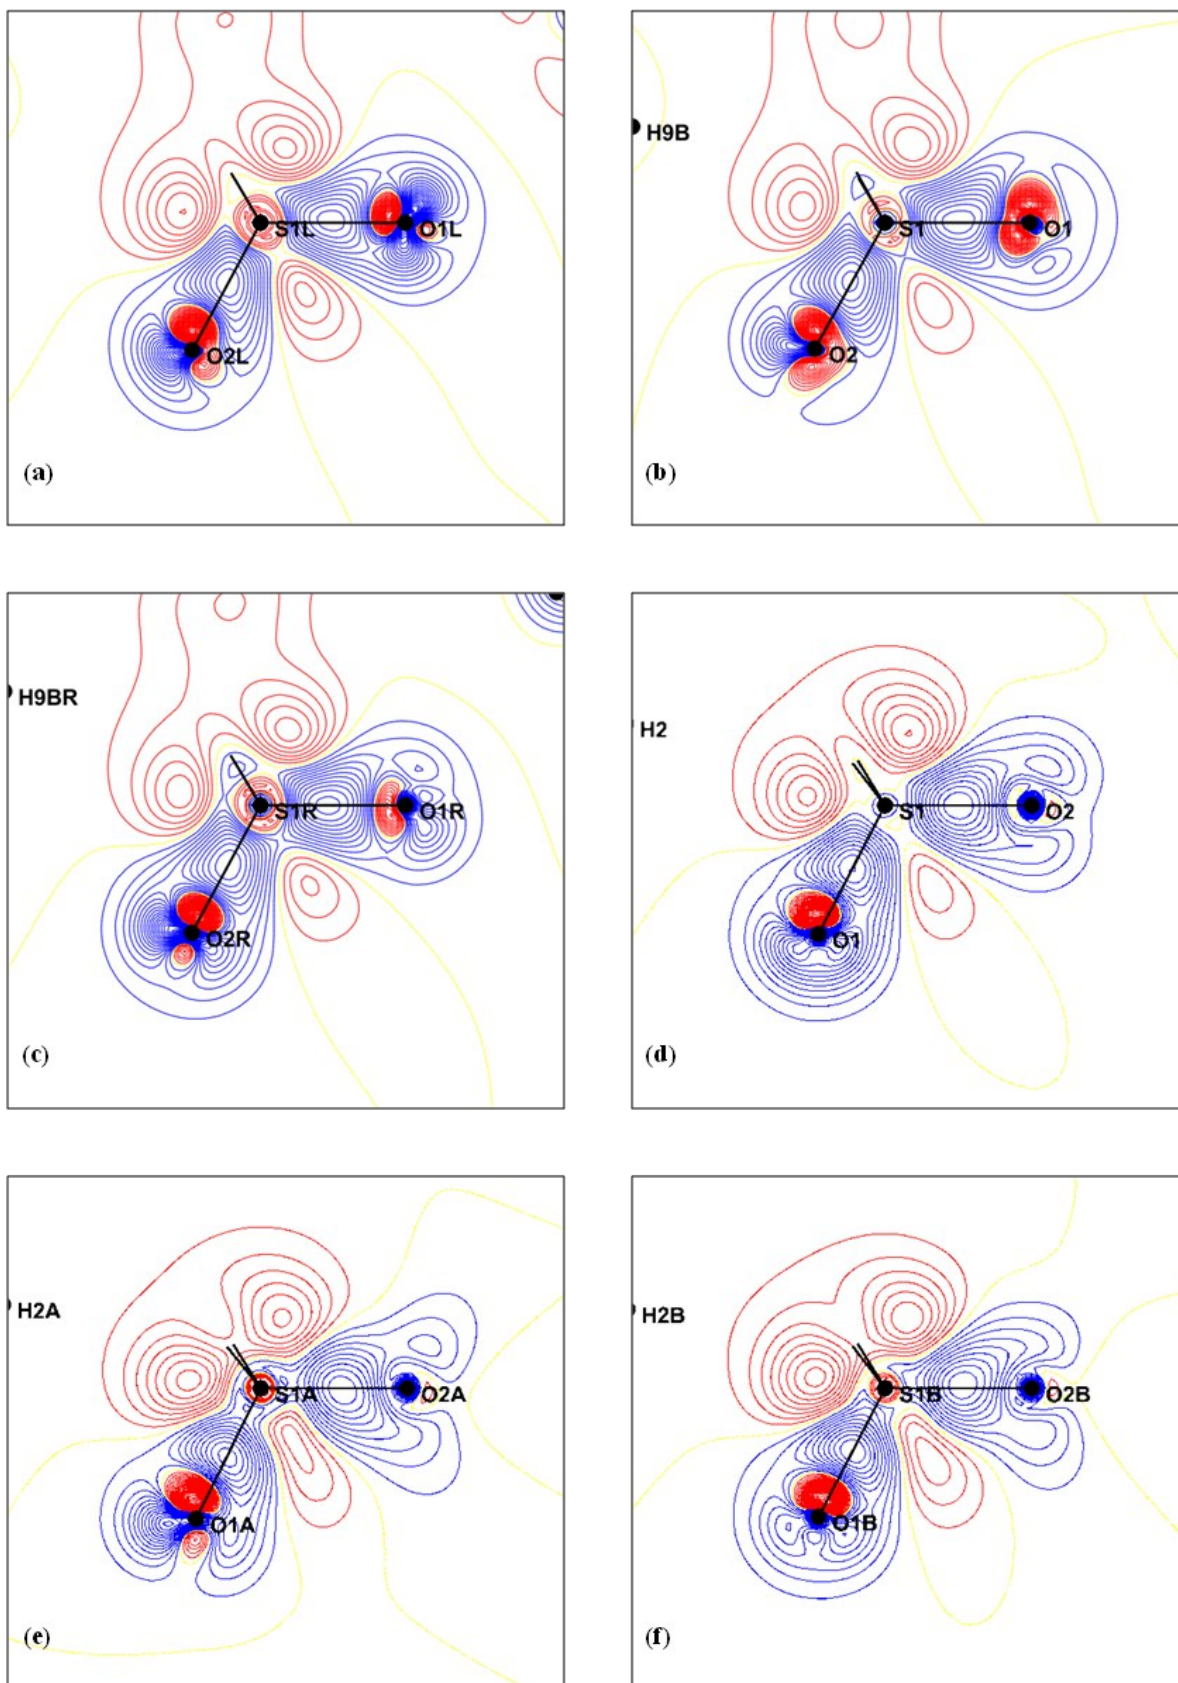

**Figure S10.** Static deformation density map at the plan S-O-O for nPX, zPXL, zPXR, sulfathiazole IV, III-A and III-B respectively. The contour intervals are  $0.05 \text{ e } \text{\AA}^{-3}$ ; positive contours are shown with blue solid lines, negative contours with red lines, and the zero contours with pale yellow dashes.



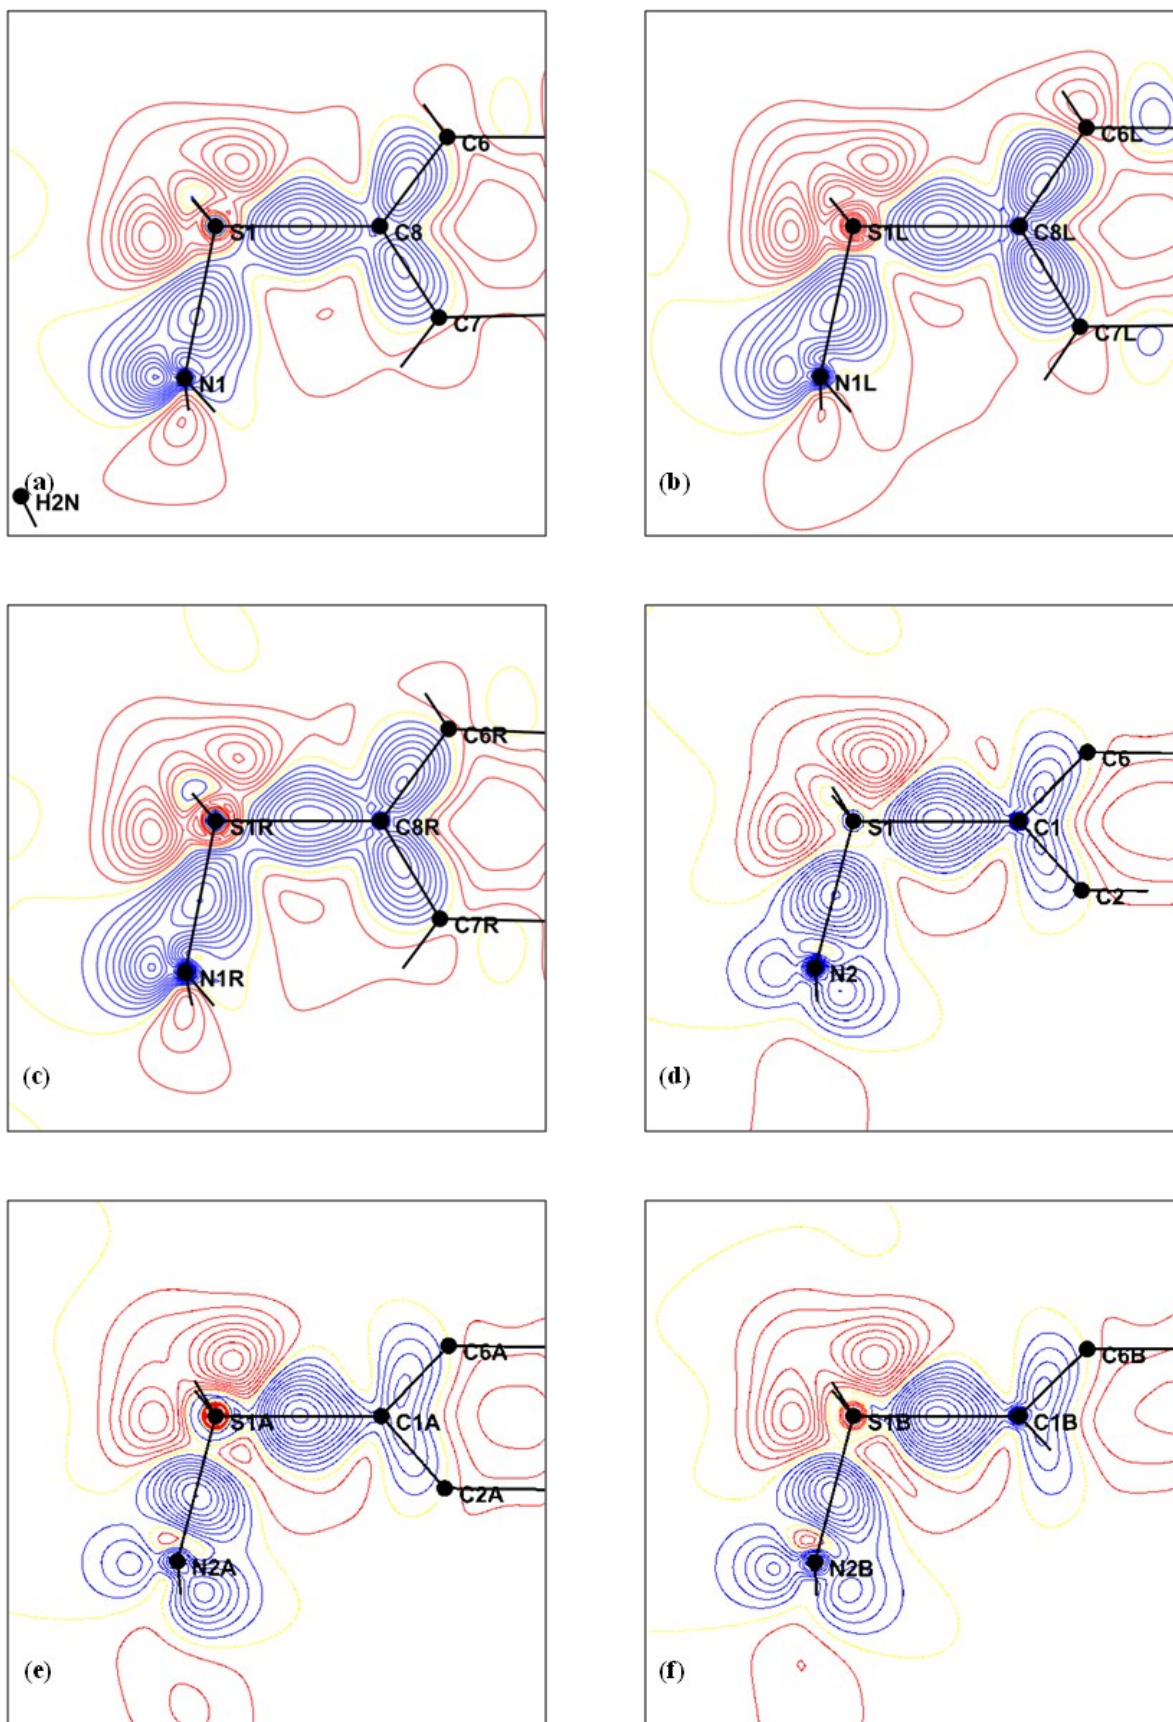

**Figure S11.** Static deformation density map at the plan S-C-N for nPX, zPXL, zPXR, sulfathiazole IV, III-A and III-B respectively. The contour intervals are  $0.05 \text{ e } \text{\AA}^{-3}$ ; positive contours are shown with blue solid lines, negative contours with red lines, and the zero contours with pale yellow dashes.

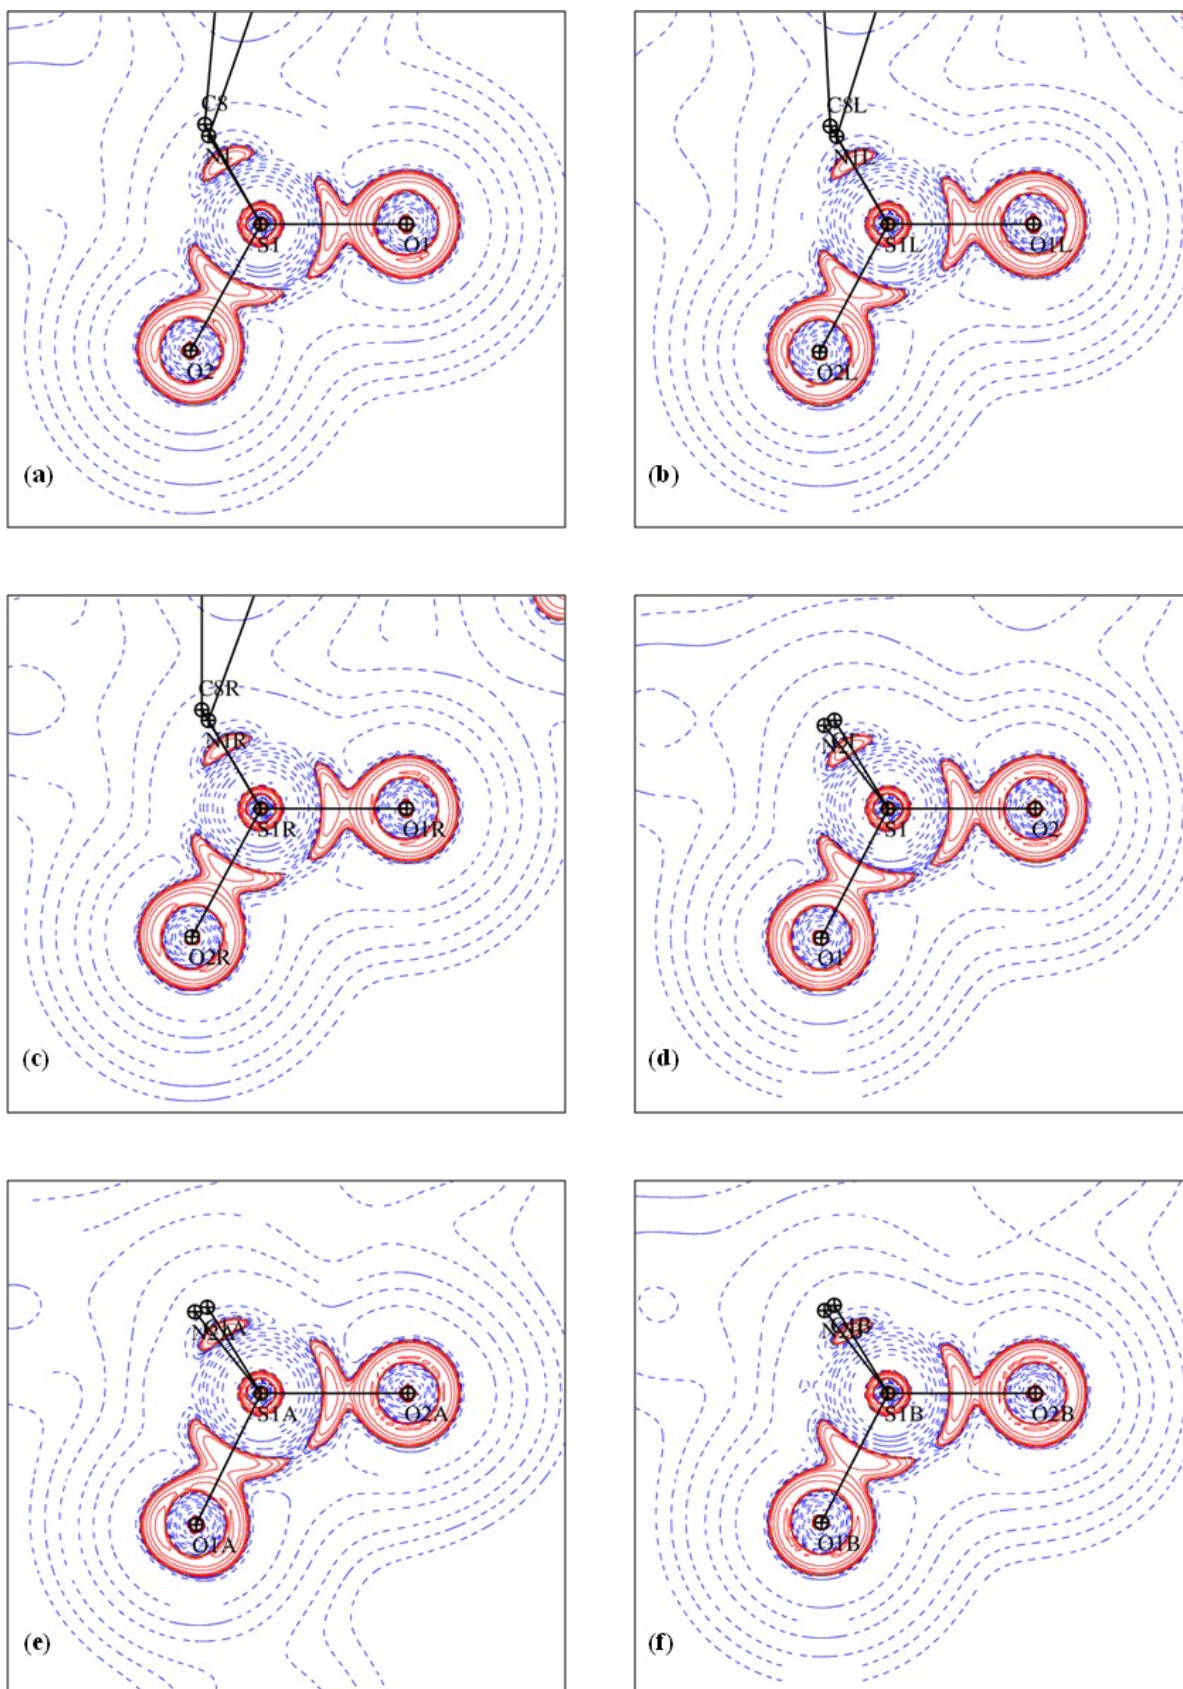

**Figure S12.** 2D laplacian map of total electron density at the plan S-O-O for nPX, zPXL, zPXR, sulfathiazole IV, III-A and III-B respectively. Contour intervals are  $\pm 2, 4, 8 \cdot 10^n \text{ e}\text{\AA}^{-5}$  ( $n=-1, 0, 1, 2$ ); positive contours are shown with blue dashed lines, negative contours with red solid lines.



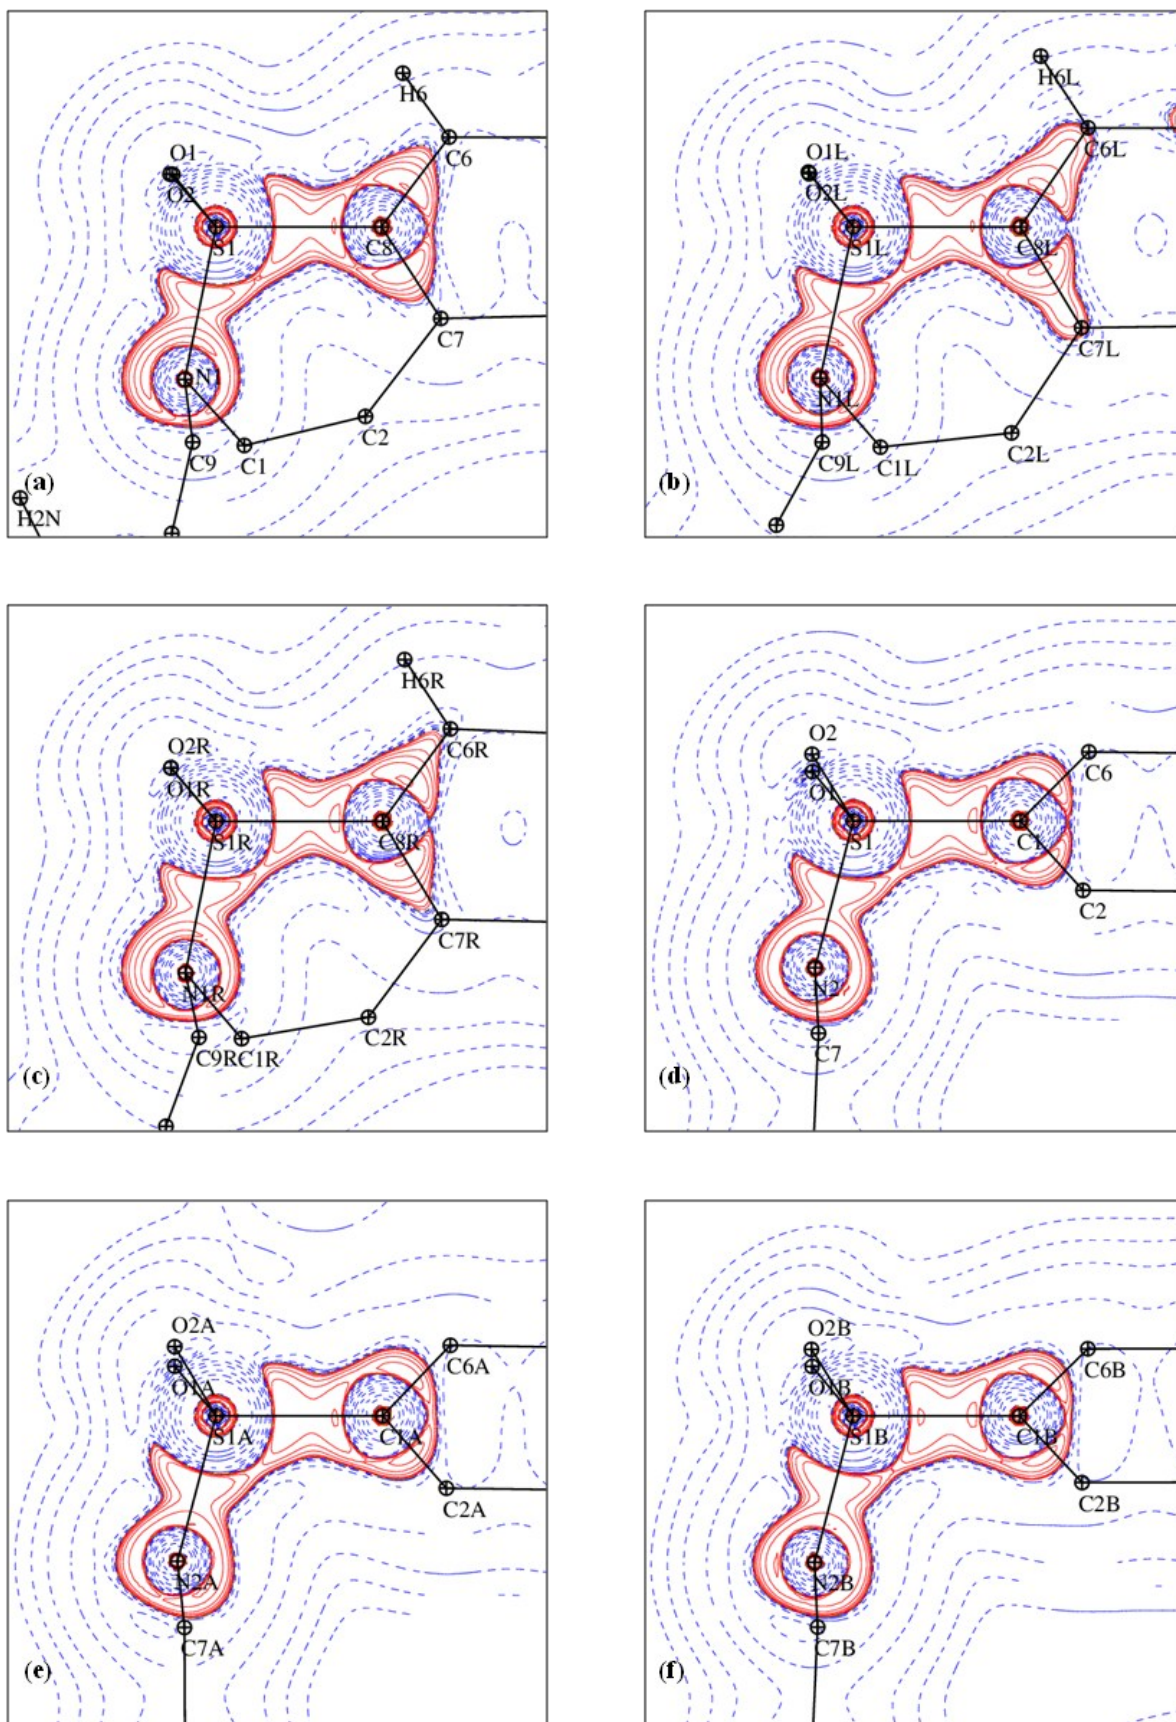

**Figure S13.** 2D laplacian map of total electron density at the plan S-C-N for nPX, zPXL, zPXR, sulfathiazole IV, III-A and III-B respectively. Contour intervals are  $\pm 2, 4, 8 \times 10^4 \text{ e}\text{\AA}^{-5}$  ( $n=-1, 0, 1, 2$ ); positive contours are shown with blue dashed lines, negative contours with red solid lines.



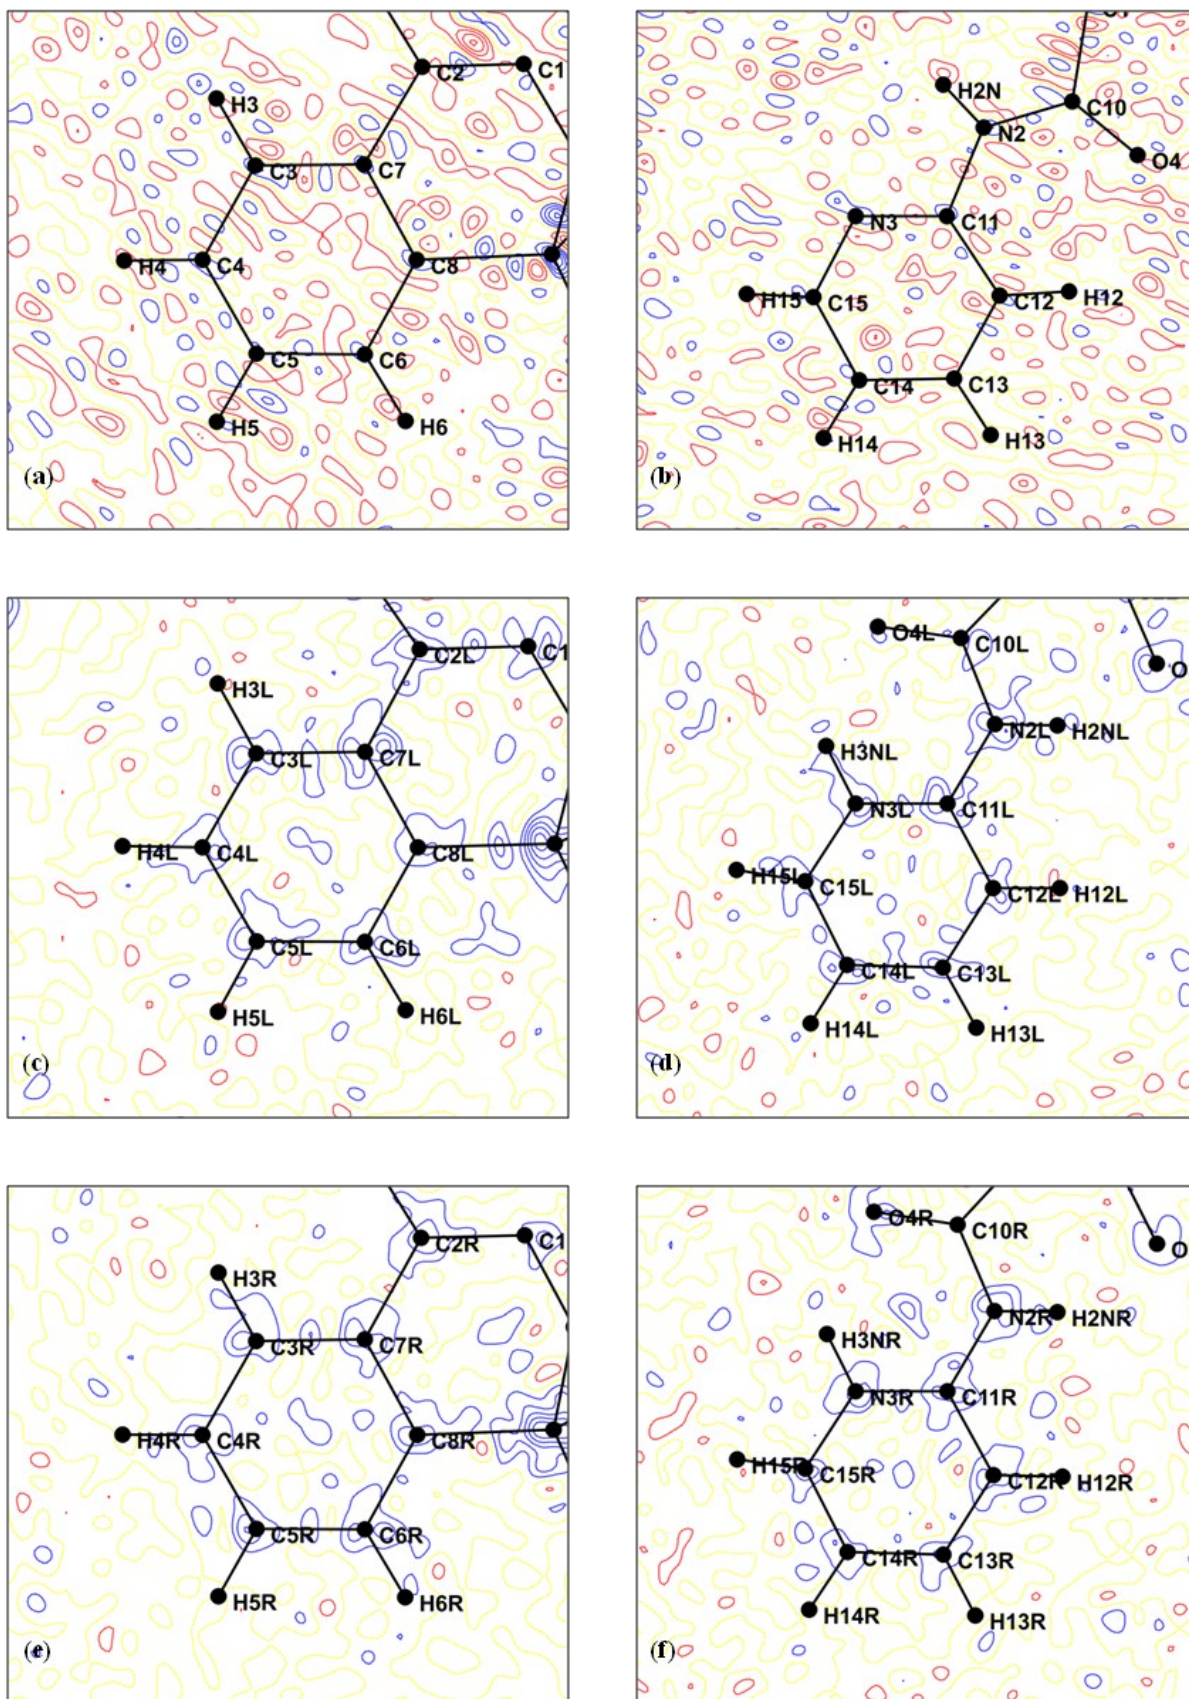

**Figure S14.** Residual density map at the phenyl and pyridine plan for nPX, zPXL, zPXR respectively. The contour intervals are  $0.1 \text{ e} \text{ \AA}^{-3}$ ; positive contours are shown with blue solid lines, negative contours with red lines, and the zero contours with pale yellow dashes.



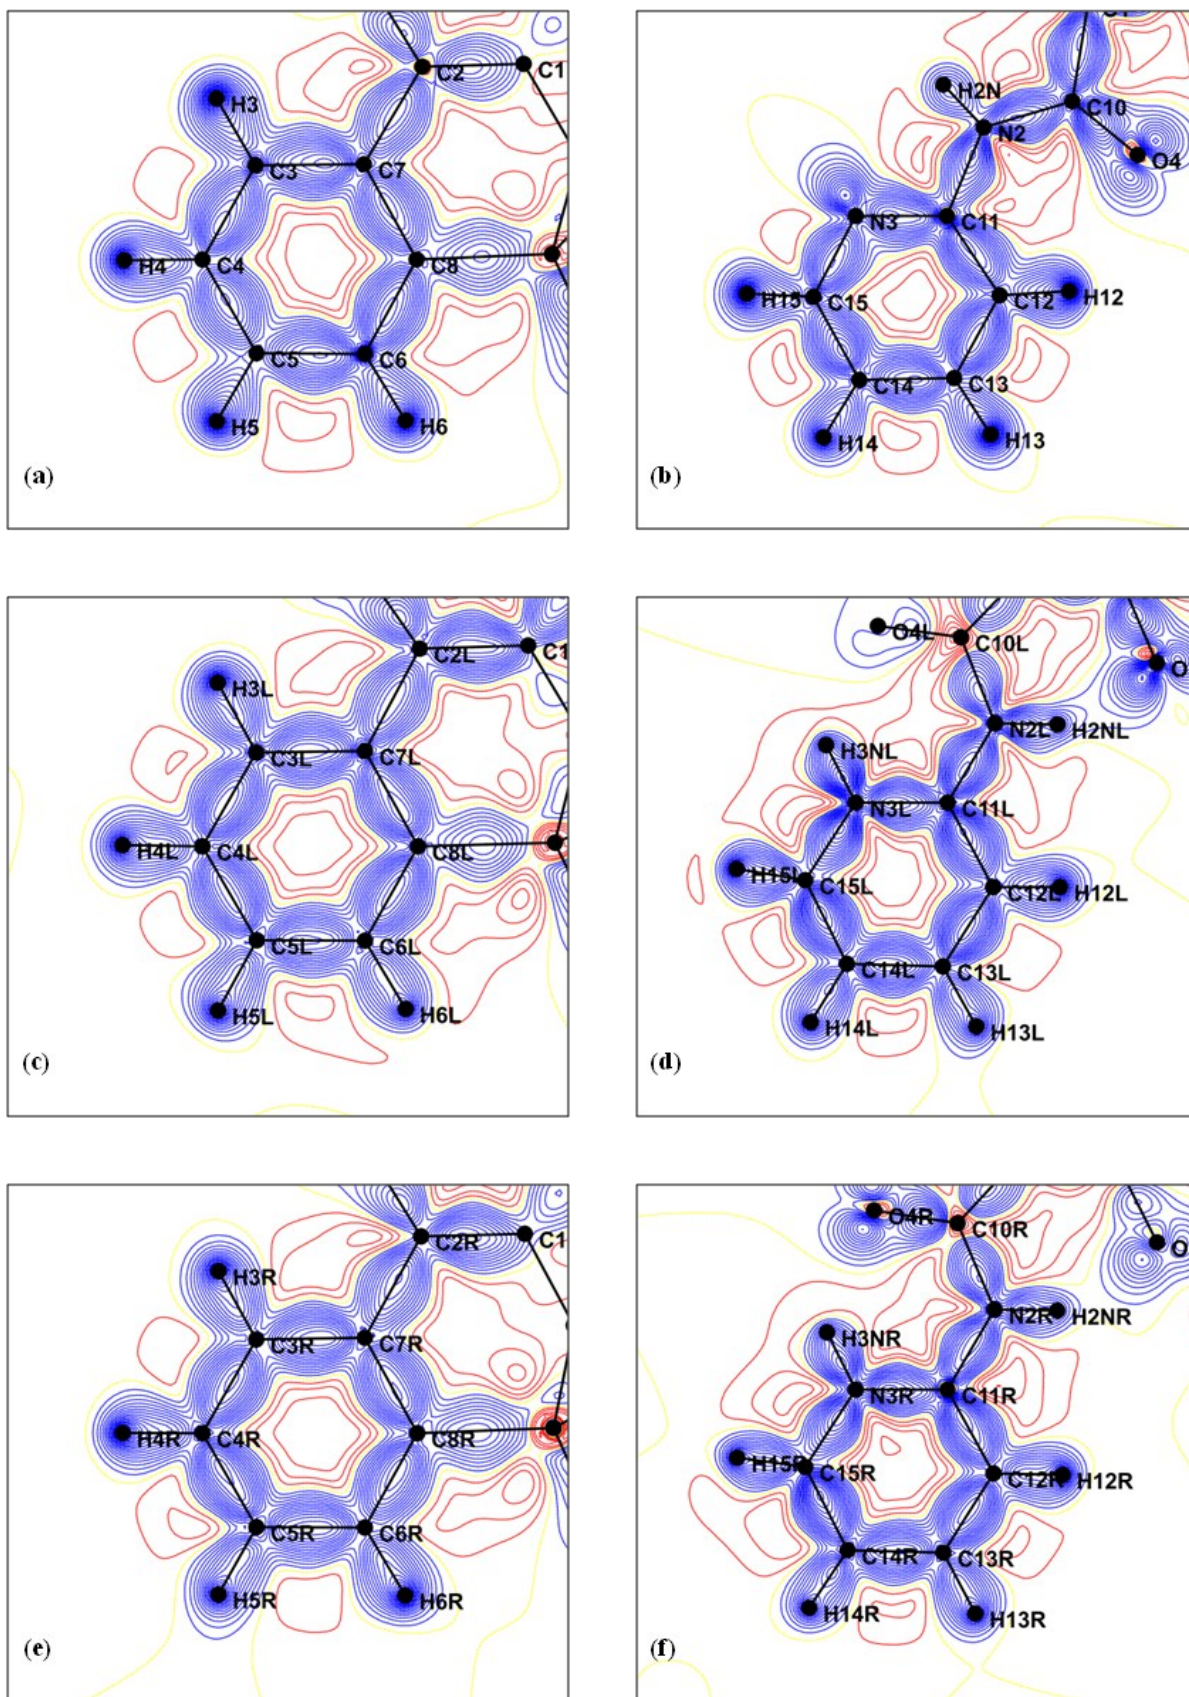

**Figure S15.** Static deformation density map at the phenyl and pyridine plan for nPX, zPXL, zPXR respectively. The contour intervals are  $0.05 \text{ e } \text{\AA}^{-3}$ ; positive contours are shown with blue solid lines, negative contours with red lines, and the zero contours with pale yellow dashes.



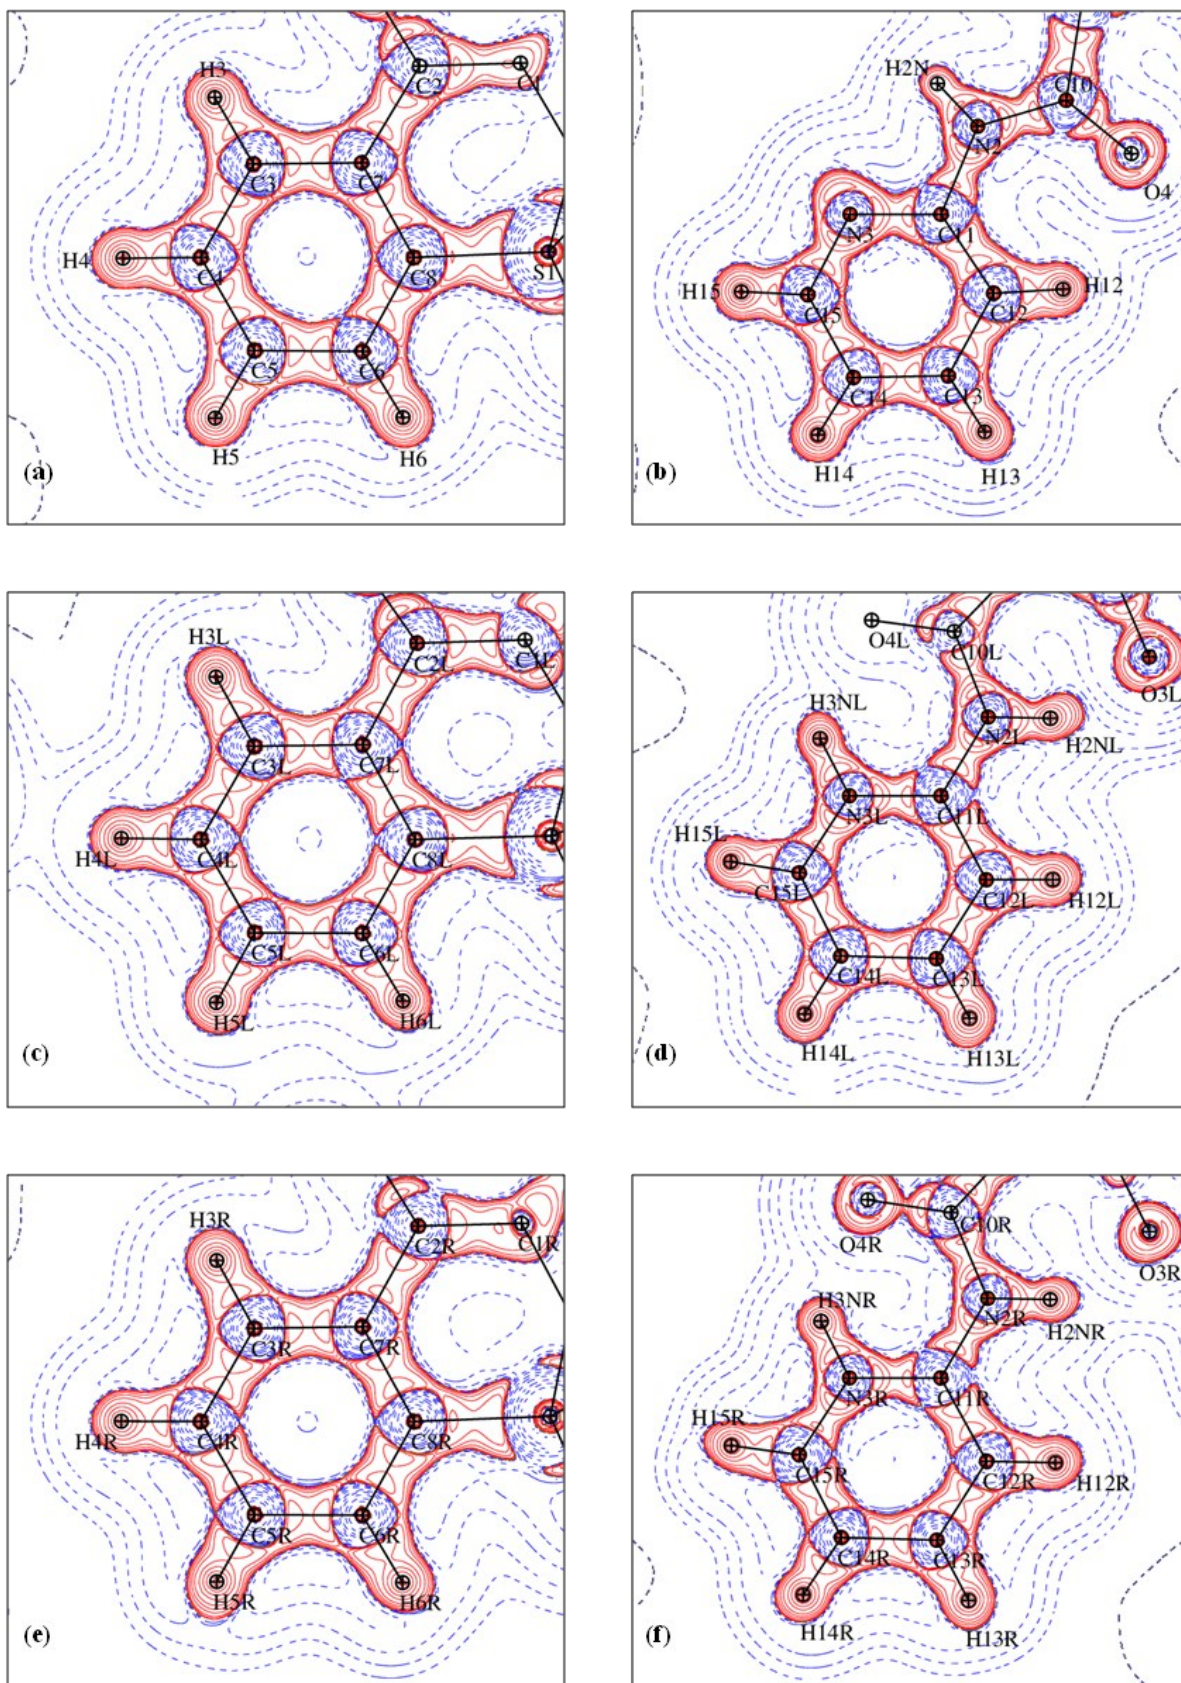

**Figure S16.** 2D laplacian map of total electron density at phenyl and pyridine plan for nPX, zPXL, zPXR respectively. Contour intervals are  $\pm 2, 4, 8 \cdot 10^n \text{ e}\text{\AA}^{-5}$  ( $n = -1, 0, 1, 2$ ); positive contours are shown with blue dashed lines, negative contours with red solid lines.

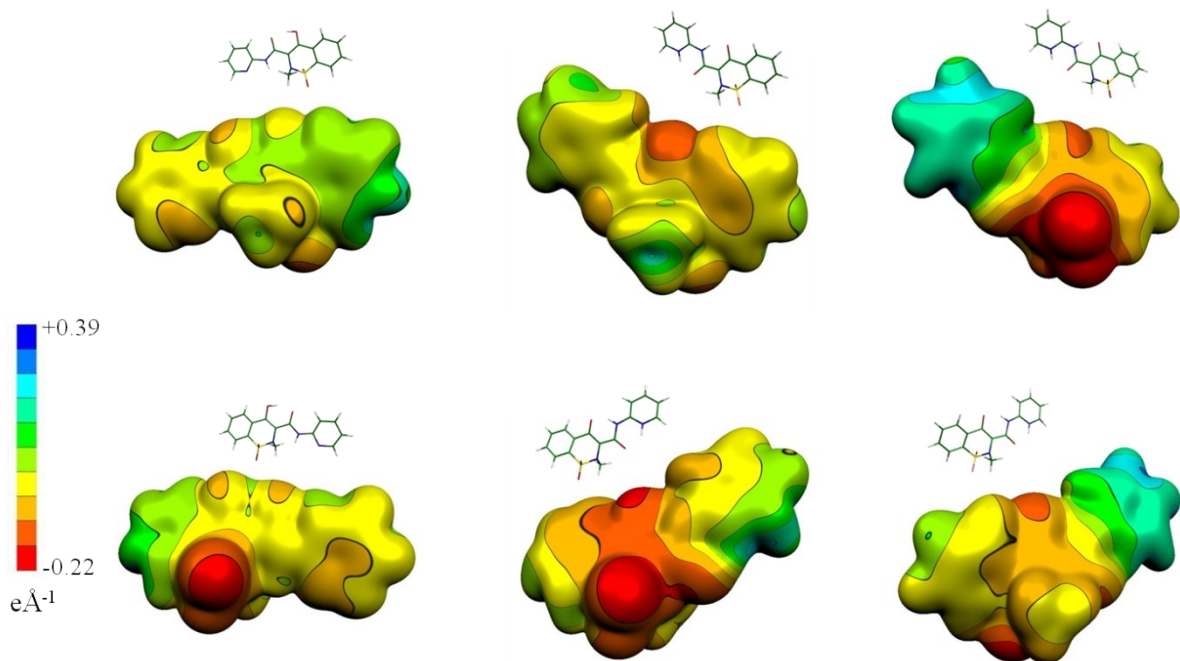

**Figure S17.** Electrostatic potential generated at the molecular surface (total electron density equals  $0.001e\text{Bohr}^{-3}$  i.e.  $0.0067e\text{\AA}^{-3}$ ) for nPX, zPXL and zPXR molecule respectively.

**Table S1.** Crystallization situations of piroxicam in polymorphs, hydrates, co-crystals, salts and complexes as retrieved from the CSD database.

| Type                | REFCODE              | Neutral             | Zwitterion    | Charged |          | Configuration | References |                                                                                                                                                                                                                                                         |
|---------------------|----------------------|---------------------|---------------|---------|----------|---------------|------------|---------------------------------------------------------------------------------------------------------------------------------------------------------------------------------------------------------------------------------------------------------|
|                     |                      |                     | zwitternionic | anionic | cationic |               |            |                                                                                                                                                                                                                                                         |
| Polymorph           | Form 1(needle, b)    | nPX                 | •             |         |          |               | EZE        | This work                                                                                                                                                                                                                                               |
|                     | Form 1(needle, b)    | BIYSEH,<br>BIYSEH01 | •             |         |          |               | EZE        | Kojic-Prodic, B.; Ruzic-Toros, Z. <i>Acta Crystallogr. Sect. B: Struct. Crystallogr. Cryst. Chem.</i> , <b>1982</b> , 38, 2948.<br>Suh, I.-H.; Kim, K.-J.; Ko, T.-S.; Kim, B.-H. <i>Chung.Kwa.Yong. (Kor.) (Chungnam J.Sci)</i> <b>1989</b> , 16, 30.   |
|                     | Form 2 (cubic, a)    | BIYSEH06            | •             |         |          |               | EZE        | Vrecer, F; Vrbine, M.; Meden, A. <i>Int.J.Pharm.</i> <b>2003</b> , 256, 3.                                                                                                                                                                              |
|                     | Form 3               | BIYSEH07            | •             |         |          |               | EZE        | Naelapaa, K.; Van de Streek, J.; Rantanen, J.; Bond, A.D. <i>J.Pharm.Sci.</i> <b>2012</b> , 101, 4214.                                                                                                                                                  |
| Hydrate             | mono                 | zPX                 |               | •       |          |               | ZZZ        | This work                                                                                                                                                                                                                                               |
|                     | mono                 | CIDYAP<br>CIDYAP01  |               | •       |          |               | ZZZ        | Bordner, J.; Richards, J.A.; Weeks, P.; Whipple, E.B. <i>Acta Crystallogr., Sect. C: Cryst. Struct. Commun.</i> <b>1984</b> , 40, 989.<br>Reck, G.; Dietz, G.; Laban, G.; Gunther, W.; Bannier, G.; Hohne, E. <i>Pharmazie</i> , <b>1988</b> , 43, 477. |
| Co-crystal          | saccharine           | YANNEH              |               | •       |          |               | ZZZ        | Bhatt, P.M.; Ravindra, N.V.; Banerjee, R.; Desirajum G.R. <i>Chem. Commun.</i> <b>2005</b> , 1073.                                                                                                                                                      |
|                     | 2-fluorobenzoic acid | CEKLAH              | •             |         |          |               | EZE        | Wales, C.; Thomas, L.H.; Wilson, C.C. <i>Cryst Eng Comm</i> , <b>2012</b> , 14, 7264.                                                                                                                                                                   |
|                     | 2-methylbenzoic acid | CEKLEL              | •             |         |          |               | EZE        |                                                                                                                                                                                                                                                         |
|                     | 3-bromobenzoic acid  | CEKLIP              | •             |         |          |               | EZE        |                                                                                                                                                                                                                                                         |
|                     | 3-chlorobenzoic acid | CEKLOV              | •             |         |          |               | EZE        |                                                                                                                                                                                                                                                         |
|                     | 3-fluorobenzoic acid | CEKLUB              | •             |         |          |               | EZE        |                                                                                                                                                                                                                                                         |
|                     | 3-nitrobenzoic acid  | CEKMAI              | •             |         |          |               | EZE        |                                                                                                                                                                                                                                                         |
|                     | 4-fluorobenzoic acid | CEKMEM              | •             |         |          |               | EZE        |                                                                                                                                                                                                                                                         |
| 2-aminobenzoic acid | CEKMIQ               |                     | •             |         |          | ZZZ           |            |                                                                                                                                                                                                                                                         |



(continued)

|                       |                                   |        |   |   |  |     |            |                                                                                               |
|-----------------------|-----------------------------------|--------|---|---|--|-----|------------|-----------------------------------------------------------------------------------------------|
| Co-crystal            | 2-bromobenzoic acid               | CEKMOW |   | • |  |     | ZZZ        | Wales, C.; Thomas, L.H.; Wilson, C.C. <i>Cryst Eng Comm</i> , <b>2012</b> , <i>14</i> , 7264. |
|                       | 2-chlorobenzoic acid              | CEKMUC |   | • |  |     | ZZZ        |                                                                                               |
|                       | 2-fluorobenzoic acid              | CEKNAJ |   | • |  |     | ZZZ        |                                                                                               |
|                       | salicylic acid                    | CEKNEN |   | • |  |     | ZZZ        |                                                                                               |
|                       | 2-nitrobenzoic acid               | CEKNIR |   | • |  |     | ZZZ        |                                                                                               |
|                       | 3-fluorobenzoic acid              | CEKNOX |   | • |  |     | ZZZ        |                                                                                               |
|                       | 3-hydroxybenzoic acid monohydrate | CEKNUD |   | • |  |     | ZZZ        |                                                                                               |
|                       | 3-methylbenzoic acid acetonitrile | CEKPAL |   | • |  |     | ZZZ        |                                                                                               |
|                       | 3-methylbenzoic acid              | CEKPEP |   | • |  |     | ZZZ        |                                                                                               |
|                       | 4-fluorobenzoic acid              | CEKPIT |   | • |  |     | ZZZ        |                                                                                               |
|                       | 4-methylbenzoic acid              | CEKPOZ |   | • |  |     | ZZZ        |                                                                                               |
|                       | succinic acid                     | DIKCIK | • |   |  |     | EZE        | Childs, S.L.; Harcastle, K.I. <i>Cryst. Growth Des.</i> <b>2007</b> , <i>7</i> , 1291.        |
|                       | 1-hydroxy-2-naphthoic acid        | DIKCOQ | • |   |  |     | EZE        |                                                                                               |
|                       | caprylic acid                     | DIKCUW | • |   |  |     | EZE        |                                                                                               |
|                       | malonic acid                      | DIKDAD | • |   |  |     | EZE        |                                                                                               |
|                       | 4-hydroxybenzoic acid             | DIKDEH | • |   |  |     | EZE        |                                                                                               |
|                       | fumaric acid                      | DIKDIL | • | • |  |     | EZE<br>ZZZ |                                                                                               |
|                       | benzoic acid                      | DIKDOR |   | • |  |     | ZZZ        |                                                                                               |
|                       | p-dioxane                         | DIRDUX |   | • |  |     | ZZZ        |                                                                                               |
| 4-hydroxybenzoic acid | NIFKIX                            |        | • |   |  | ZZZ |            |                                                                                               |

(continued)

|               |                                    |          |   |   |   |   |     |                                                                                                                            |     |
|---------------|------------------------------------|----------|---|---|---|---|-----|----------------------------------------------------------------------------------------------------------------------------|-----|
| Co-crystal    | acetate                            | TIGNEE   | • |   |   |   | EZE | Mishnev, A.; Kiselovs, G. (2013)<br><i>Z.Naturforsch.,B:Chem.Sci.</i> <b>2013</b> , 68,168.                                |     |
|               | furosemide acetone                 | XIFRAH   | • |   |   |   | EZE |                                                                                                                            |     |
|               | isobutyric acid                    | XIFREL   | • |   |   |   | EZE |                                                                                                                            |     |
|               | Triazole(0.5)                      | SOHWUJ   |   | • |   |   | ZZZ | Thomas, L.H.; Klapwijk, A.R.; Wales, C.; Wilson, C.C.<br><i>CrystEngComm</i> <b>2014</b> , 16, 5924.                       |     |
|               | Benzotriazole                      | SOHXAQ   |   | • |   |   | ZZZ |                                                                                                                            |     |
|               | Hemipyrazine                       | SOHXEU   |   | • |   |   | ZZZ |                                                                                                                            |     |
| Salt          | ethaloamine                        | SECDAF   |   |   | • |   | ZZE | Bordner, J.; Hammen, P.D.; Whipple E.B. <i>J. Am. Chem. Soc.</i> <b>1989</b> , 111, 6572.                                  |     |
|               | bromanilic acid                    | SOHVOC   |   |   |   | • | EZE |                                                                                                                            |     |
|               | imidazole hemihydrate              | SOHVUI   |   |   | • |   | ZZE | Thomas, L.H.; Klapwijk, A.R.; Wales, C.; Wilson, C.C.<br><i>CrystEngComm</i> <b>2014</b> , 16, 5924.                       |     |
|               | imidazole acetonitrile             | SOHWAP   |   |   | • |   | ZZE |                                                                                                                            |     |
|               | imidazole acetonitrile(0.25)       | SOHWET   |   |   | • |   | ZZE |                                                                                                                            |     |
|               | 2-methylimidazole                  | SOHWIX   |   |   | • |   | ZZE |                                                                                                                            |     |
|               | Benzimidazole                      | SOHWOD   |   |   | • |   | ZZE |                                                                                                                            |     |
|               | chloranilic acid                   | SOHXIY   |   |   |   |   | •   |                                                                                                                            | EZE |
|               |                                    | SOHXIY01 |   |   |   |   | •   |                                                                                                                            | EZE |
|               | chloranilic acid(0.5) acetonitrile | SOHXUK   |   |   |   |   | •   |                                                                                                                            | EZE |
| hydrochloride | TIGNAA                             |          |   |   |   | • | EZE | Mishnev, A.; Kiselovs, G. <i>Z.Naturforsch.,B:Chem.Sci.</i> <b>2013</b> , 68, 168.                                         |     |
| Complex       | Cu                                 | AGIHII   |   |   | • |   | ZZZ | Tamasi, G.; Serinelli, F.; Consumi, M.; Magnani, A.; Casolaro, M.; Cini, R. <i>J.Inorg.Biochem.</i> <b>2008</b> ,102,1862. |     |
|               | Sn                                 | JOQQUB   |   |   | • |   | ZZE | Hadjikakou, S.; Demertzis, M.A.; Miller, J.R.; Kovala-Demertzi, D. <i>J.Chem.Soc.,Dalton Trans.</i> <b>1999</b> ,          |     |

|  |  |  |  |  |  |  |  |      |
|--|--|--|--|--|--|--|--|------|
|  |  |  |  |  |  |  |  | 663. |
|--|--|--|--|--|--|--|--|------|

(continued)

|         |        |        |   |  |   |  |     |                                                                                                                                                                                        |
|---------|--------|--------|---|--|---|--|-----|----------------------------------------------------------------------------------------------------------------------------------------------------------------------------------------|
| Complex | Pt, Cl | NUSHOY | • |  |   |  | EZE | Di Leo, D.; Berrettini, F.; Cini, R. <i>J.Chem.Soc.,Dalton Trans.</i> <b>1998</b> , 1993.                                                                                              |
|         | Pt,Cl  | ZOJJUD | • |  |   |  | EZE | Cini, R. <i>J.Chem.Soc.,Dalton Trans.</i> <b>1996</b> , 111.                                                                                                                           |
|         | Sn     | RAFRIA |   |  | • |  | EZE | Kovala-Demertzi, D.; Koutsodimou, A.; Galani, A.; Hadjikakou, S.K.; Demertzis, M.A.; Xanthopoulou, M.; Miller, J.R.; Frampton, C.S. <i>Appl.Organomet.Chem.</i> <b>2004</b> , 18, 501. |
|         | Ru,Cl  | BINNAP | • |  |   |  | EZE | Raja, M.U.; Tauchman, J.; Therrien, B.; Suss-Fink, G.; Riedel, T.; Dyson, P.J. <i>Inorg.Chim.Acta</i> <b>2014</b> , 409, 479.                                                          |
|         | Co     | BIPDEL |   |  | • |  | ZZZ | Darabi, F.; Ebrahimi, M.; Hadadzadeh, H.; Khayamian, T.; Rudbari, H.A. <i>Inorg.Chim.Acta</i> <b>2013</b> , 409, 379.                                                                  |
|         | Ru     | DOBPER |   |  | • |  | ZZZ | Jannesari, Z.; Hadadzadeh, H.; Khayamian, T.; Maleki, B.; Rudbari, H.A. <i>J.Med.Chem.</i> <b>2013</b> , 69, 577.                                                                      |
|         | Mn     | HOCDUA |   |  | • |  | ZZZ | Tamasi, G.; Corsini, M. ; Cini, R <i>Z.Anorg.Allg.Chem.</i> <b>2014</b> , 640, 952.                                                                                                    |
|         | Cu     | NEDFIN |   |  | • |  | ZZZ | Hadadzadeh, H.; Salimi, M.; Weil, M.; Jannesari, Z.; Darabi, F.; Abdi, K.; Khalaji, A.D.; Sardari, S.; Ahangari, R. <i>J.Mol.Struct.</i> <b>2012</b> , 1022, 172.                      |
|         | Cd     | VIKMOR |   |  | • |  | ZZZ | Cini, R.; Giorgi, G.; Cinquantini, A.; Rossi, C.; Sabat, M.                                                                                                                            |
|         | Cu     | VIKMUX |   |  | • |  | ZZZ | <i>Inorg.Chem.</i> <b>1990</b> , 29, 5197                                                                                                                                              |

**Table S2.** Data Collection and Refinement Details of form III and IV of sulfathiazole

|                                                             |                                                                            |                                                                            |
|-------------------------------------------------------------|----------------------------------------------------------------------------|----------------------------------------------------------------------------|
| Compound formula                                            | C <sub>9</sub> H <sub>9</sub> N <sub>3</sub> S <sub>2</sub> O <sub>2</sub> | C <sub>9</sub> H <sub>9</sub> N <sub>3</sub> S <sub>2</sub> O <sub>2</sub> |
| Polymorph form                                              | III                                                                        | IV                                                                         |
| formula weight                                              | 254.30                                                                     | 254.30                                                                     |
| crystal system                                              | monoclinic                                                                 | monoclinic                                                                 |
| space group                                                 | P2 <sub>1</sub> /a                                                         | P2 <sub>1</sub> /n                                                         |
| <i>a</i> (Å)                                                | 17.3862(5)                                                                 | 10.7689(3)                                                                 |
| <i>b</i> (Å)                                                | 8.4812(2)                                                                  | 8.4602(3)                                                                  |
| <i>c</i> (Å)                                                | 15.4873(4)                                                                 | 11.3733(3)                                                                 |
| $\beta$ (°)                                                 | 112.7460(10)                                                               | 91.6270(10)                                                                |
| <i>V</i> (Å <sup>3</sup> )                                  | 2106.09(10)                                                                | 1035.77(5)                                                                 |
| <i>Z</i>                                                    | 8                                                                          | 4                                                                          |
| <i>D</i> <sub>calc</sub> (g cm <sup>-3</sup> )              | 1.57                                                                       | 1.631                                                                      |
| $\lambda$ (Å)                                               | 0.71069                                                                    | 0.71069                                                                    |
| $\mu$ (mm <sup>-1</sup> )                                   | 0.493                                                                      | 0.501                                                                      |
| temperature/K                                               | 100(2)                                                                     | 100(2)                                                                     |
| crystal size                                                |                                                                            |                                                                            |
| $\theta$ range/deg                                          | 2.79 to 62.84                                                              | 3.00 to 45.58                                                              |
| ( $\sin \theta/\lambda$ ) <sub>max</sub> (Å <sup>-1</sup> ) | 1.25                                                                       | 1.00                                                                       |
| average redundancy                                          |                                                                            |                                                                            |
| Completeness                                                | 99.6%                                                                      | 99.9%                                                                      |
| reflections collected                                       | 349008                                                                     | 116151                                                                     |
| independent reflections                                     | 33493                                                                      | 8792                                                                       |
| hkl range                                                   | -43 ≤ <i>h</i> ≤ 43<br>-21 ≤ <i>k</i> ≤ 21<br>-38 ≤ <i>l</i> ≤ 38          | -21 ≤ <i>h</i> ≤ 21<br>-16 ≤ <i>k</i> ≤ 17<br>-22 ≤ <i>l</i> ≤ 22          |
| <i>R</i> <sub>int</sub>                                     | 0.0729                                                                     | 0.0318                                                                     |
| Spherical atom refinement:                                  |                                                                            |                                                                            |
| no. of data in refinement                                   | 33493                                                                      | 8792                                                                       |
| no. of refined parameters                                   | 296                                                                        | 151                                                                        |
| no. of reflect. used [ <i>I</i> > 2σ( <i>I</i> )]           | 20160                                                                      | 7541                                                                       |
| R( <i>F</i> )/wR( <i>F</i> )                                | 0.0483/0.1469                                                              | 0.0278/0.1077                                                              |
| goodness of fit                                             | 1.027                                                                      | 0.977                                                                      |
| Multipole refinement:                                       |                                                                            |                                                                            |
| no. of reflection used                                      | 13979                                                                      | 9115                                                                       |
| no. of refined parameters                                   | 451                                                                        | 172                                                                        |
| R( <i>F</i> )/wR( <i>F</i> )                                | 0.021/0.017                                                                | 0.019/0.016                                                                |
| goodness of fit                                             | 0.490                                                                      | 0.539                                                                      |

**Table S3.** Estimate of average error on the electron density map.  $\sigma(\Delta\rho) = 2/V * [\sum (k.Fo-Fc)^2]^{1/2}$  (Rees, B. Acta Cryst. 1976, A32, 483-488)

| <i>Experiment</i>               | $\sigma(\Delta\rho)/e.\text{\AA}^{-3}$ |
|---------------------------------|----------------------------------------|
| Piroxicam form I (nPX)          | 0.0789                                 |
| Hydrated piroxicam (zPXL; zPXR) | 0.0756                                 |
| Sulfathiazole form III          | 0.0741                                 |
| Sulfathiazole form IV           | 0.0588                                 |

**Table S4.** Topology of the experimental electron density of piroxicam (nPX, zPXL and zPXR) for covalent bonds not listed in the paper.

| Bond A-B | d(CP-A)<br>(Å) | d(CP-B)<br>(Å) | $\rho(\mathbf{r}_{cp})$<br>(eÅ <sup>-3</sup> ) | $\nabla^2\rho(\mathbf{r}_{cp})$<br>(eÅ <sup>-5</sup> ) | $\varepsilon$ |
|----------|----------------|----------------|------------------------------------------------|--------------------------------------------------------|---------------|
| C2-C7    | 0.724          | 0.744          | 1.88                                           | -14.6                                                  | 0.21          |
|          | 0.747          | 0.747          | 1.80                                           | -13.2                                                  | 0.19          |
|          | 0.763          | 0.732          | 1.80                                           | -13.6                                                  | 0.21          |
| C3-C7    | 0.725          | 0.672          | 2.12                                           | -17.9                                                  | 0.15          |
|          | 0.709          | 0.690          | 2.12                                           | -18.7                                                  | 0.19          |
|          | 0.684          | 0.714          | 2.12                                           | -18.4                                                  | 0.22          |
| C3-C4    | 0.720          | 0.673          | 2.14                                           | -18.5                                                  | 0.15          |
|          | 0.686          | 0.706          | 2.19                                           | -19.7                                                  | 0.24          |
|          | 0.705          | 0.689          | 2.16                                           | -19.3                                                  | 0.19          |
| C4-C5    | 0.713          | 0.682          | 2.14                                           | -18.8                                                  | 0.14          |
|          | 0.698          | 0.698          | 2.16                                           | -19.2                                                  | 0.19          |
|          | 0.709          | 0.688          | 2.15                                           | -18.5                                                  | 0.22          |
| C5-C6    | 0.679          | 0.714          | 2.14                                           | -19.1                                                  | 0.18          |
|          | 0.702          | 0.691          | 2.11                                           | -17.6                                                  | 0.21          |
|          | 0.692          | 0.703          | 2.13                                           | -18.1                                                  | 0.19          |
| C6-C8    | 0.683          | 0.706          | 2.12                                           | -18.7                                                  | 0.23          |
|          | 0.697          | 0.695          | 2.17                                           | -19.0                                                  | 0.19          |
|          | 0.684          | 0.706          | 2.12                                           | -18.8                                                  | 0.21          |
| C7-C8    | 0.690          | 0.715          | 2.08                                           | -17.6                                                  | 0.20          |
|          | 0.689          | 0.715          | 2.08                                           | -16.8                                                  | 0.26          |
|          | 0.696          | 0.708          | 2.11                                           | -17.8                                                  | 0.23          |
| C11-C12  | 0.710          | 0.688          | 2.13                                           | -18.5                                                  | 0.20          |
|          | 0.740          | 0.666          | 2.16                                           | -19.6                                                  | 0.18          |
|          | 0.720          | 0.684          | 2.12                                           | -18.8                                                  | 0.23          |
| C12-C13  | 0.688          | 0.700          | 2.19                                           | -19.5                                                  | 0.21          |
|          | 0.681          | 0.695          | 2.28                                           | -21.3                                                  | 0.23          |
|          | 0.692          | 0.685          | 2.22                                           | -20.4                                                  | 0.22          |
| C13-C14  | 0.680          | 0.712          | 2.15                                           | -18.7                                                  | 0.19          |
|          | 0.688          | 0.717          | 2.11                                           | -18.7                                                  | 0.18          |
|          | 0.708          | 0.697          | 2.08                                           | -17.9                                                  | 0.16          |
| C14-C15  | 0.749          | 0.642          | 2.14                                           | -18.8                                                  | 0.20          |
|          | 0.651          | 0.717          | 2.29                                           | -22.6                                                  | 0.25          |
|          | 0.638          | 0.732          | 2.28                                           | -21.9                                                  | 0.27          |

**Table S5** Selected bond lengths and angles. Standard deviations are in parentheses. For hydrogen bonds, D is the donor and A, the acceptor.

| <i>Distances</i>       | <b>nPX</b>           | <b>zPXL</b> | <b>zPXR</b> |
|------------------------|----------------------|-------------|-------------|
| S1-O1                  | 1.4354(7)            | 1.4332(2)   | 1.4346(1)   |
| S1-O2                  | 1.4310(5)            | 1.4347(1)   | 1.4366(1)   |
| S1-N1                  | 1.6442(12)           | 1.6331(1)   | 1.6309(2)   |
| S1-C8                  | 1.7464(6)            | 1.7628(1)   | 1.7556(1)   |
| O3-C2                  | 1.3327(5)            | 1.2676(1)   | 1.2768(1)   |
| O4-C10                 | 1.2479(5)            | 1.2516(1)   | 1.2412(1)   |
| N1-C1                  | 1.4334(5)            | 1.4417(1)   | 1.4413(1)   |
| N1-C9                  | 1.4858(8)            | 1.4769(2)   | 1.4771(1)   |
| N2-C10                 | 1.3557(6)            | 1.3917(1)   | 1.3881(1)   |
| N2-C11                 | 1.4055(7)            | 1.3536(1)   | 1.3637(1)   |
| C7-C3                  | 1.3975(5)            | 1.3994(1)   | 1.3978(1)   |
| C4-C3                  | 1.3932(7)            | 1.3926(1)   | 1.3935(1)   |
| C4-C5                  | 1.3945(6)            | 1.3959(2)   | 1.3962(2)   |
| C5-C6                  | 1.3933(5)            | 1.3927(1)   | 1.3949(1)   |
| C8-C6                  | 1.3888(7)            | 1.3923(1)   | 1.3908(1)   |
| C8-C7                  | 1.4048(6)            | 1.4037(1)   | 1.4046(2)   |
| C7-C2                  | 1.4677(8)            | 1.4942(1)   | 1.4954(1)   |
| C1-C2                  | 1.3720(6)            | 1.4152(1)   | 1.4031(1)   |
| C1-C10                 | 1.4692(8)            | 1.4284(1)   | 1.4406(1)   |
| C11-C12                | 1.3983(6)            | 1.4062(1)   | 1.4037(1)   |
| C12-C13                | 1.3881(7)            | 1.3761(1)   | 1.3773(1)   |
| C14-C13                | 1.3918(6)            | 1.4053(1)   | 1.4046(1)   |
| C14-C15                | 1.3916(6)            | 1.3687(2)   | 1.3699(1)   |
| N3-C11                 | 1.3368(5)            | 1.3462(1)   | 1.3444(1)   |
| N3-C15                 | 1.3397(7)            | 1.3554(1)   | 1.3552(1)   |
| <b>Angles</b>          |                      |             |             |
| O2-S1-O1               | 119.05(3)            | 118.13(2)   | 118.28(1)   |
| N1-S1-C8               | 101.58(3)            | 102.39(1)   | 101.37(1)   |
| S1-C8-C7               | 116.46(4)            | 117.45(2)   | 116.51(2)   |
| S1-N1-C1               | 112.82(3)            | 113.57(2)   | 112.87(2)   |
| N1-C1-C10              | 118.11 (4)           | 115.88(2)   | 114.73(2)   |
| C10-C1-C2              | 120.70(5)            | 123.16(2)   | 124.53(2)   |
| C10-N2-C11             | 128.86(5)            | 126.56(2)   | 126.34(2)   |
| O4-C10-C1              | 120.51(4)            | 125.15(2)   | 123.95(2)   |
| O3-C2-C1               | 122.54(5)            | 124.44(2)   | 123.98(2)   |
| <b>Dihedral angles</b> |                      |             |             |
| O4-C10-C1-N1           | 174.37(2)            | -2.32(2)    | -0.22(2)    |
| N3-C11-N2-C10          | -176.78(3)           | -14.74(1)   | -6.55(1)    |
| C1-C10-N2-C11          | -176.71(3)           | -175.93(2)  | -170.08(2)  |
| <b>H-bonds nPX</b>     |                      |             |             |
| <i>symmetry</i>        |                      |             |             |
| O3-H3O...O4            | <i>x, y, z</i>       | 1.730(2)    | 2.561(1)    |
| N2-H2N...O2            | <i>2-x, -y, -z</i>   | 2.301(2)    | 2.999(2)    |
| <b>H-bonds zPX</b>     |                      |             |             |
| N2L-H2NL...O3L         | <i>x, y, z</i>       | 1.713(2)    | 2.5300(1)   |
| N2R-H2NR...O3R         | <i>x, y, z</i>       | 1.780(2)    | 2.5873(1)   |
| N3L-H3NL...O4L         | <i>x, y, z</i>       | 1.987(2)    | 2.6732(2)   |
| N3R-H3NR...O1L         | <i>x, y, z</i>       | 2.561(1)    | 2.9396(2)   |
| N3R-H3NR...O4R         | <i>x, y, z</i>       | 1.924(2)    | 2.6501(2)   |
| O5B-H5OB...O3R         | <i>x, y, z</i>       | 1.838(2)    | 2.7522(1)   |
| O5B-H6OB...O4L         | <i>x, y, I+z</i>     | 1.882(1)    | 2.8075(2)   |
| O5A-H5OA...O5B         | <i>I-x, I-y, I-z</i> | 1.982(1)    | 2.9134(2)   |
| N3L-H3NL...O4R         | <i>2-x, I-y, -z</i>  | 2.052(1)    | 2.7824(1)   |
| N3R-H3NR...O4L         | <i>2-x, I-y, -z</i>  | 2.207(1)    | 2.8857(1)   |
